# Supplementary material for: Efficient synthesis of oligosaccharyl 1,2-O-orthoesters from n-pentenyl glycosides and application to the pentaarabinofuranoside of the mycobacterial cell surface
Source: Royal Society of Chemistry journal article supplement (doi:10.1039/c4ob01395f), 2014-10-03
Supplement: c4ob01395f1.pdf [file c4ob01395f1.pdf]

## Supporting information for

### **Efficient synthesis of oligosaccharyl 1,2-*O*-orthoesters from *n*-pentenyl glycosides and application to the pentaarabinofuranoside of mycobacterial cell surface**

Shivaji A. Thadke and Srinivas Hotha\*

Department of Chemistry, Indian Institute of Science Education and Research

Pune – 411 008, India

*s.hotha@iiserpune.ac.in*

## Contents

| <b>Compound No.</b>                                                      | <b>Page No.</b> |
|--------------------------------------------------------------------------|-----------------|
| <sup>1</sup> H, <sup>13</sup> C, DEPT NMR Spectrum of Compound <b>1a</b> | S2              |
| <sup>1</sup> H, <sup>13</sup> C, DEPT NMR Spectrum of Compound <b>2a</b> | S3              |
| <sup>1</sup> H, <sup>13</sup> C, DEPT NMR Spectrum of Compound <b>3a</b> | S4              |
| <sup>1</sup> H, <sup>13</sup> C, DEPT NMR Spectrum of Compound <b>3b</b> | S5              |
| <sup>1</sup> H, <sup>13</sup> C, DEPT NMR Spectrum of Compound <b>3c</b> | S6              |
| <sup>1</sup> H, <sup>13</sup> C, DEPT NMR Spectrum of Compound <b>1b</b> | S7              |
| <sup>1</sup> H, <sup>13</sup> C, DEPT NMR Spectrum of Compound <b>2b</b> | S8              |
| <sup>1</sup> H, <sup>13</sup> C, DEPT NMR Spectrum of Compound <b>1c</b> | S9              |
| <sup>1</sup> H, <sup>13</sup> C, DEPT NMR Spectrum of Compound <b>2c</b> | S10             |
| <sup>1</sup> H, <sup>13</sup> C, DEPT NMR Spectrum of Compound <b>1d</b> | S11             |
| <sup>1</sup> H, <sup>13</sup> C, DEPT NMR Spectrum of Compound <b>2d</b> | S12             |
| <sup>1</sup> H, <sup>13</sup> C, DEPT NMR Spectrum of Compound <b>4</b>  | S13             |
| <sup>1</sup> H, <sup>13</sup> C, DEPT NMR Spectrum of Compound <b>5</b>  | S14             |
| <sup>1</sup> H, <sup>13</sup> C, DEPT NMR Spectrum of Compound <b>6</b>  | S15             |
| <sup>1</sup> H, <sup>13</sup> C, DEPT NMR Spectrum of Compound <b>7</b>  | S16             |
| <sup>1</sup> H, <sup>13</sup> C, DEPT NMR Spectrum of Compound <b>8</b>  | S17             |
| <sup>1</sup> H, <sup>13</sup> C, DEPT NMR Spectrum of Compound <b>9</b>  | S18             |
| <sup>1</sup> H, <sup>13</sup> C, DEPT NMR Spectrum of Compound <b>10</b> | S19             |
| <sup>1</sup> H, <sup>13</sup> C, DEPT NMR Spectrum of Compound <b>11</b> | S20             |
| <sup>1</sup> H, <sup>13</sup> C, DEPT NMR Spectrum of Compound <b>12</b> | S21             |
| <sup>1</sup> H, <sup>13</sup> C, DEPT NMR Spectrum of Compound <b>13</b> | S22             |
| References                                                               | S23             |

### $^1\text{H}$ NMR Spectrum (399.78 MHz, $\text{CDCl}_3$ ) of Compound **1a**<sup>1</sup>

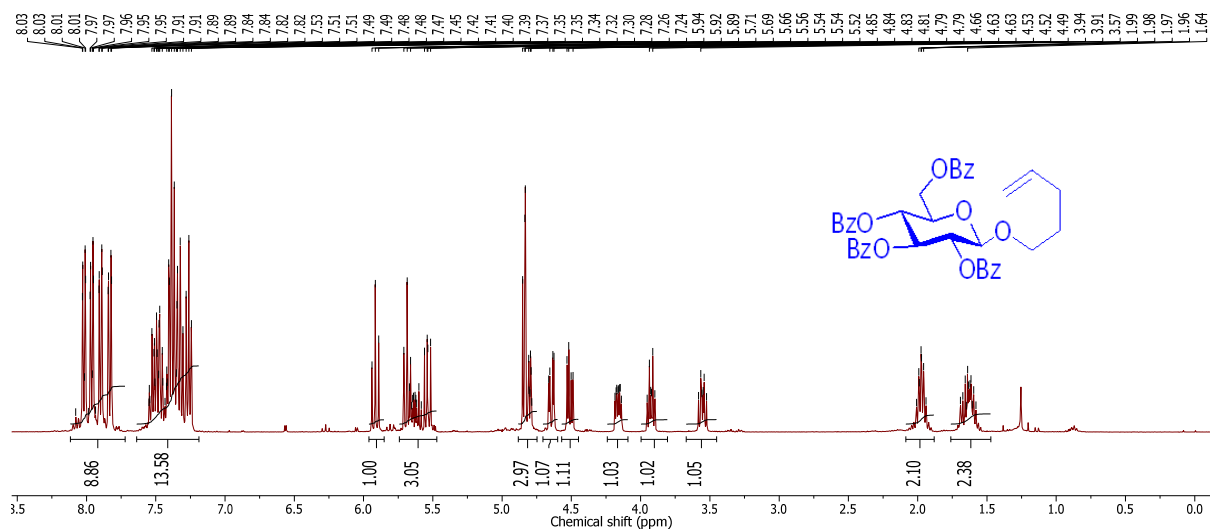

### $^{13}\text{C}$ NMR Spectrum (100.53 MHz, $\text{CDCl}_3$ ) of Compound **1a**<sup>1</sup>

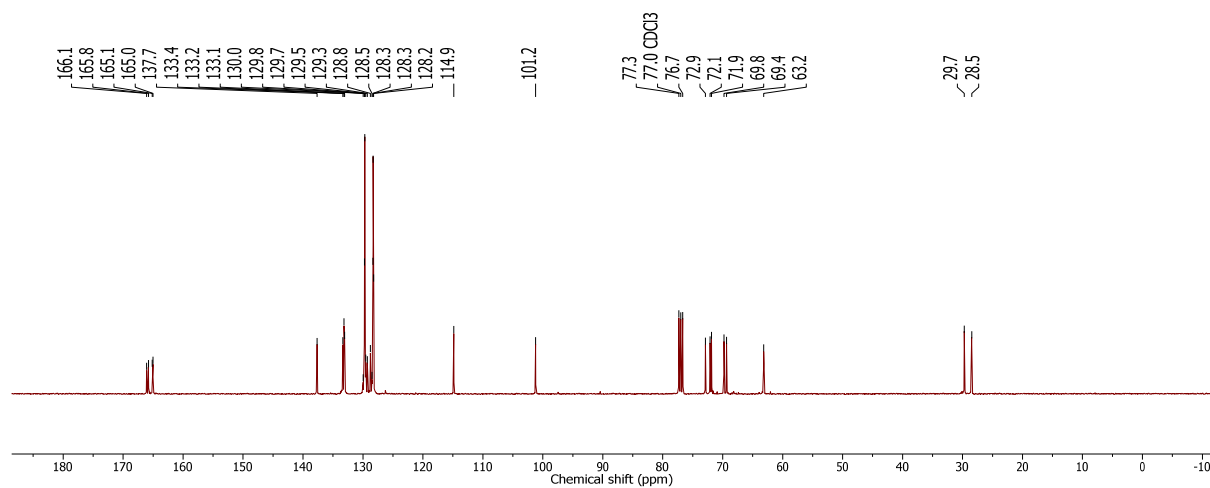

### DEPT NMR Spectrum (100.53 MHz, $\text{CDCl}_3$ ) of Compound **1a**<sup>1</sup>

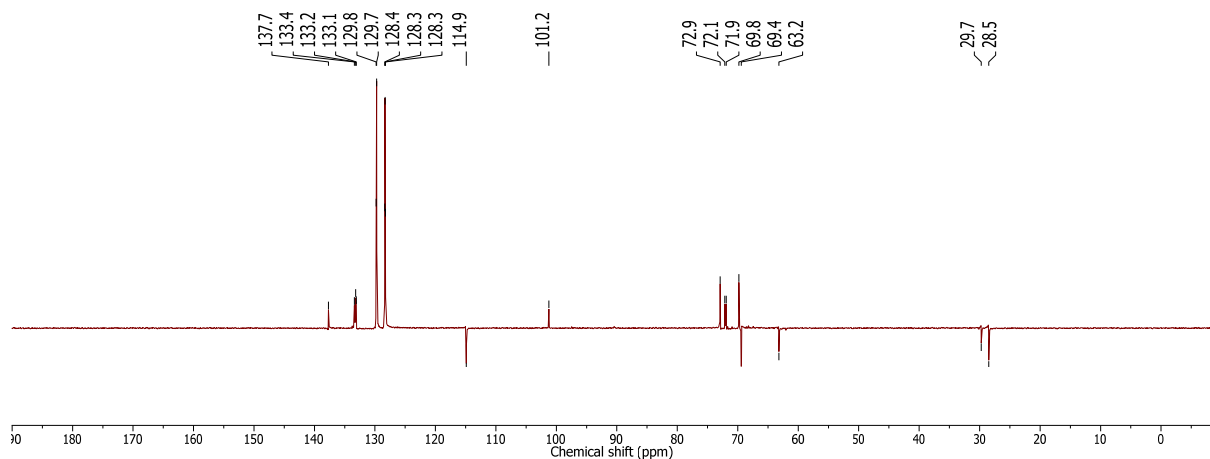

### $^1\text{H}$ NMR Spectrum (399.78 MHz, $\text{CDCl}_3$ ) of Compound **2a**<sup>2</sup>

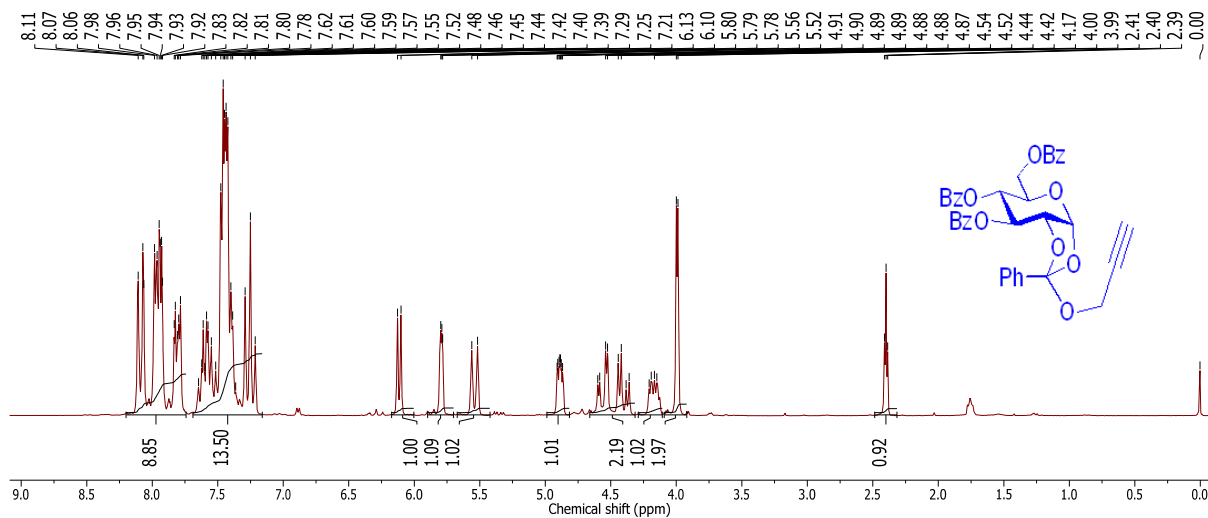

### $^{13}\text{C}$ NMR Spectrum (100.53 MHz, $\text{CDCl}_3$ ) of Compound **2a**<sup>2</sup>

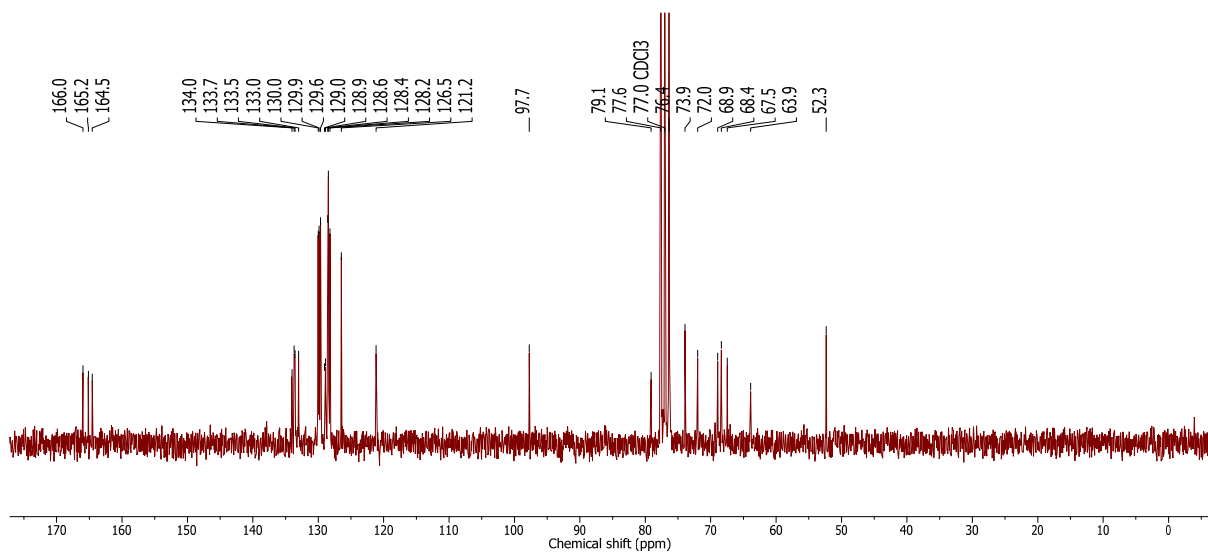

### DEPT NMR Spectrum (100.53 MHz, $\text{CDCl}_3$ ) of Compound **2a**<sup>2</sup>

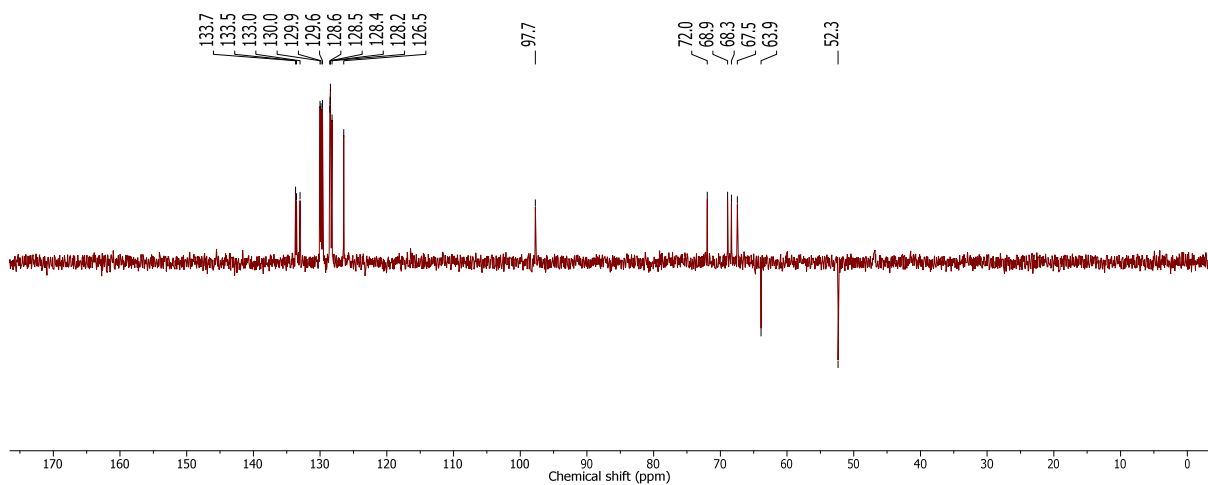

### $^1\text{H}$ NMR Spectrum (399.78 MHz, $\text{CDCl}_3$ ) of Compound $3a^2$

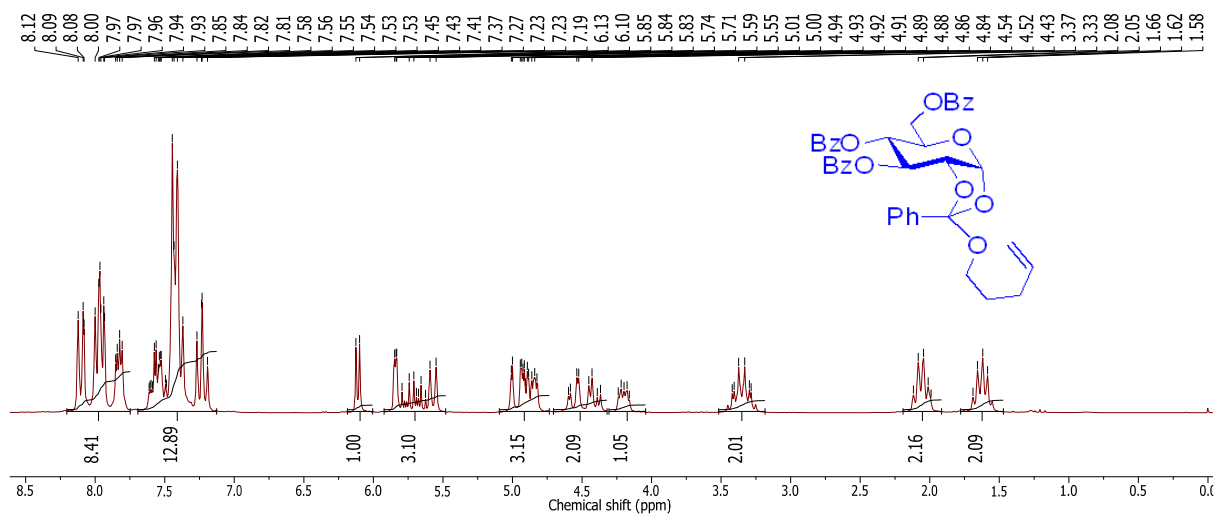

### $^{13}\text{C}$ NMR Spectrum (100.53 MHz, $\text{CDCl}_3$ ) of Compound $3a^2$

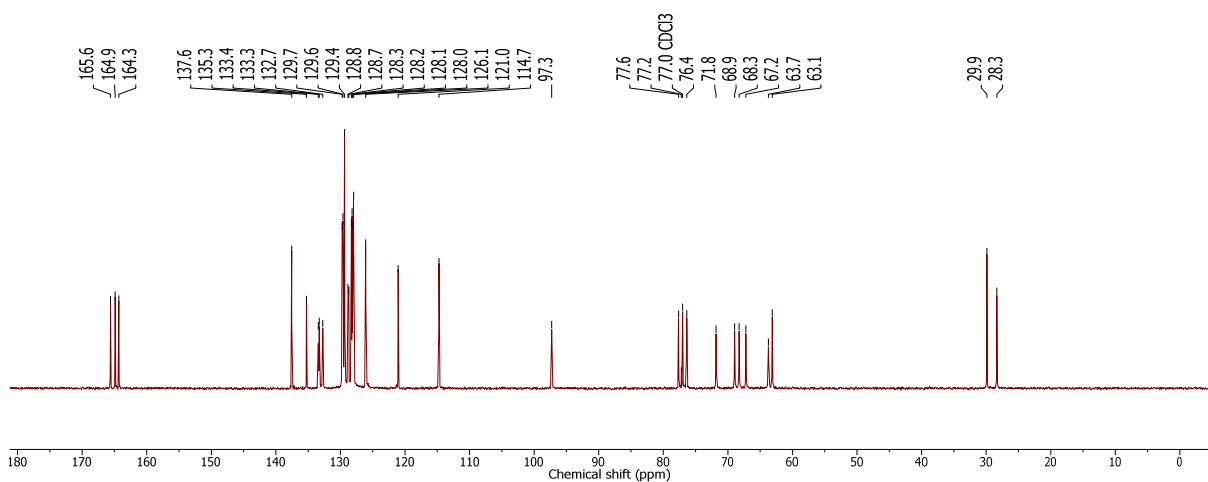

### DEPT NMR Spectrum (100.53 MHz, $\text{CDCl}_3$ ) of Compound $3a^2$

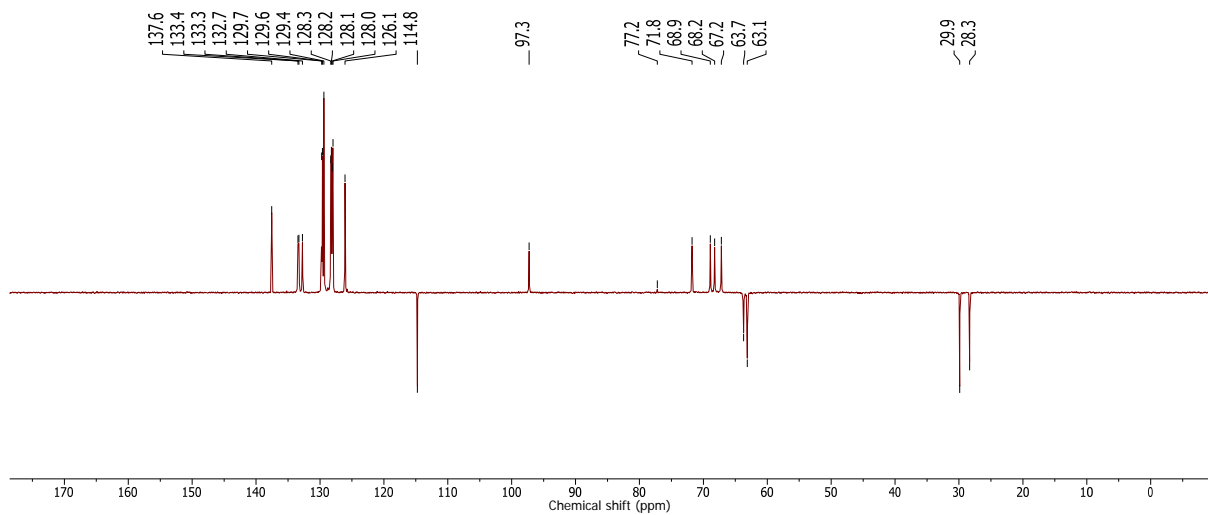

$^1\text{H}$  NMR Spectrum (399.78 MHz,  $\text{CDCl}_3$ ) of Compound  $3b^3$

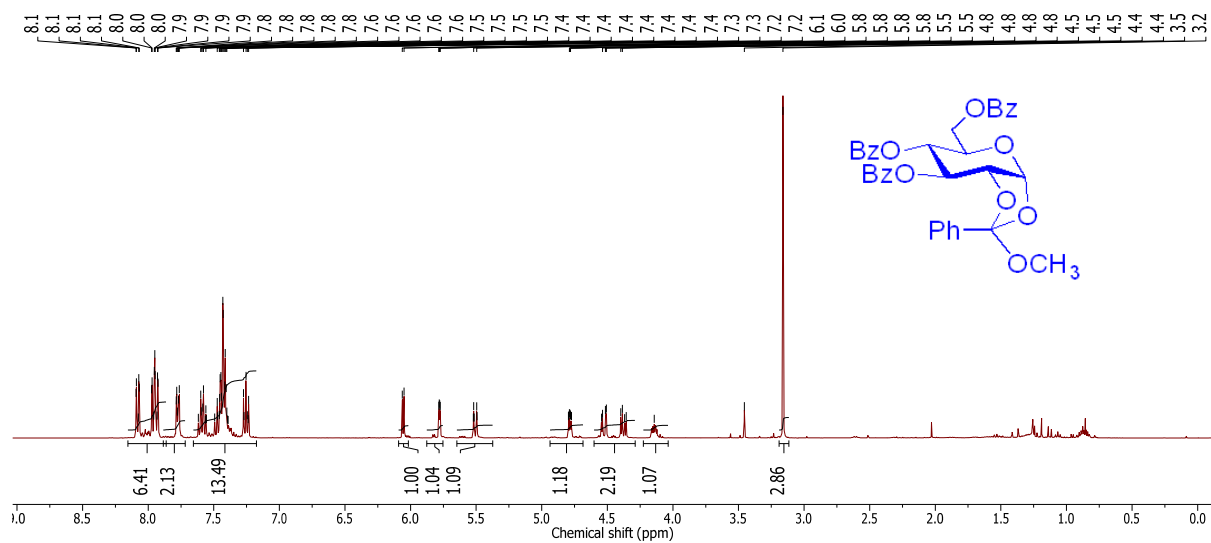

$^{13}\text{C}$  NMR Spectrum (100.53 MHz,  $\text{CDCl}_3$ ) of Compound  $3b^3$

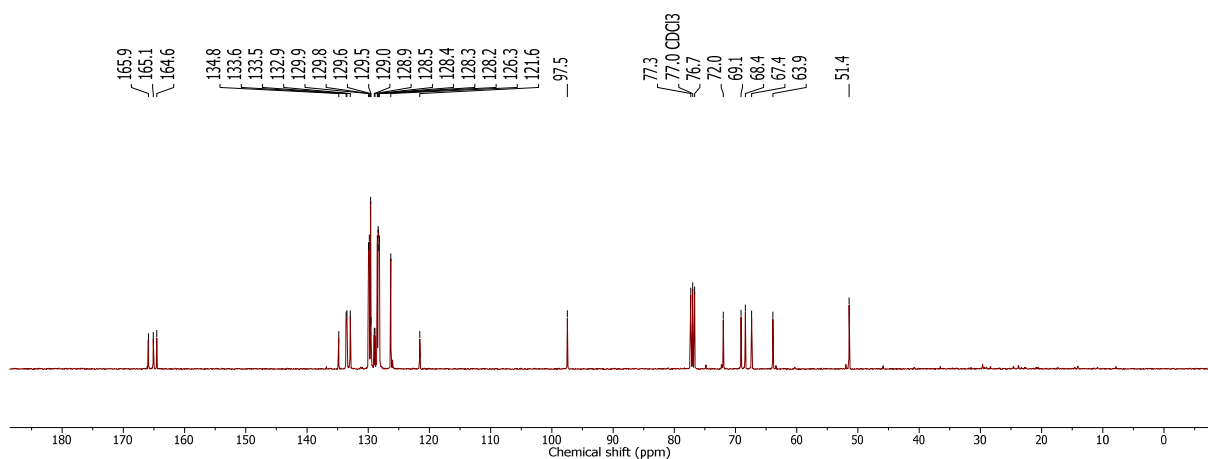

DEPT NMR Spectrum (100.53 MHz,  $\text{CDCl}_3$ ) of Compound  $3b^3$

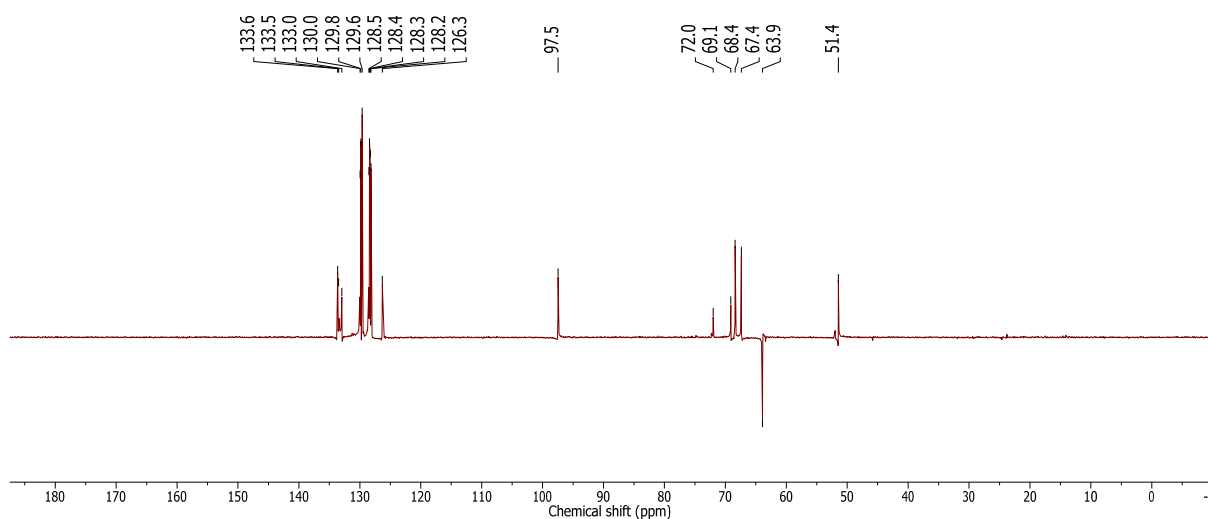

### $^1\text{H}$ NMR Spectrum (399.78 MHz, $\text{CDCl}_3$ ) of Compound **3c**<sup>4</sup>

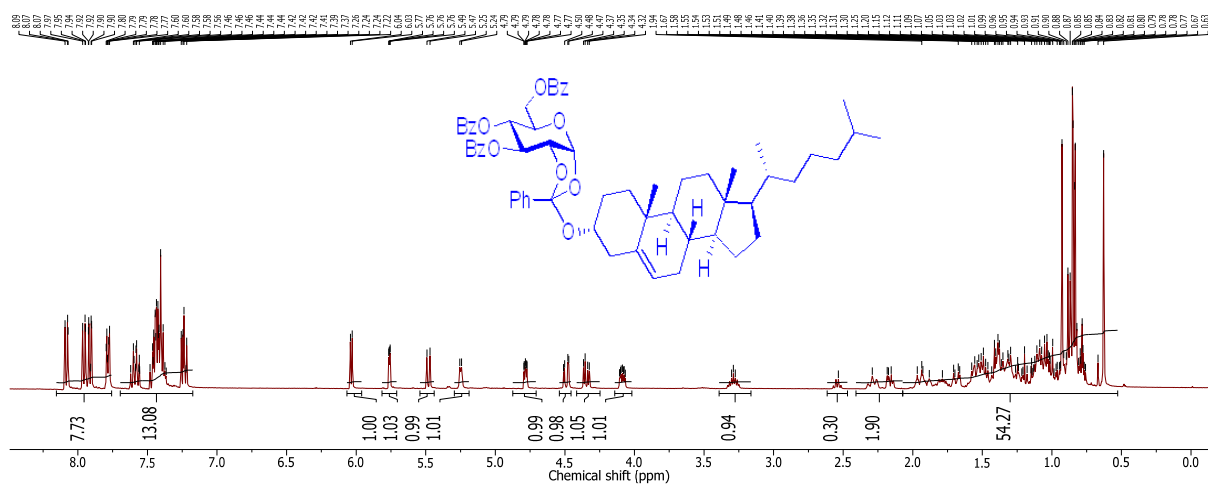

### $^{13}\text{C}$ NMR Spectrum (100.53 MHz, $\text{CDCl}_3$ ) of Compound **3c**<sup>4</sup>

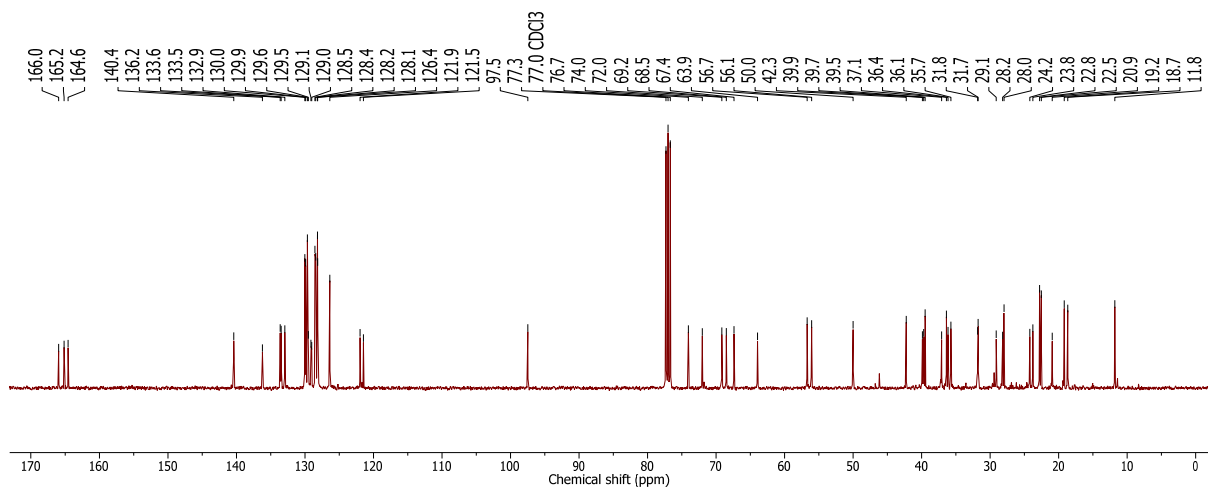

### DEPT NMR Spectrum (100.53 MHz, $\text{CDCl}_3$ ) of Compound **3c**<sup>4</sup>

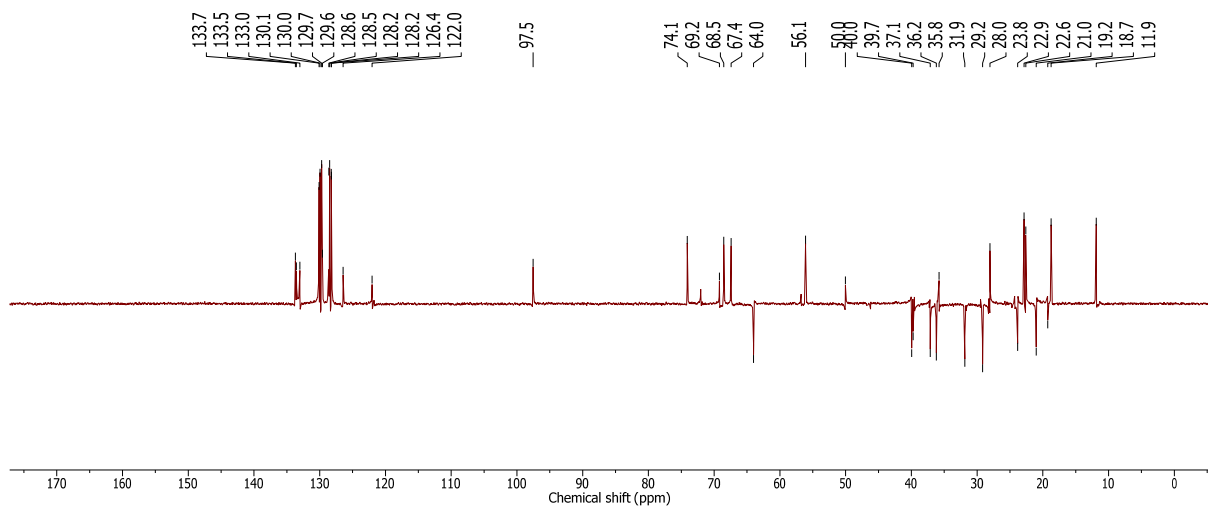

### $^1\text{H}$ NMR Spectrum (399.78 MHz, $\text{CDCl}_3$ ) of Compound **1b**<sup>5</sup>

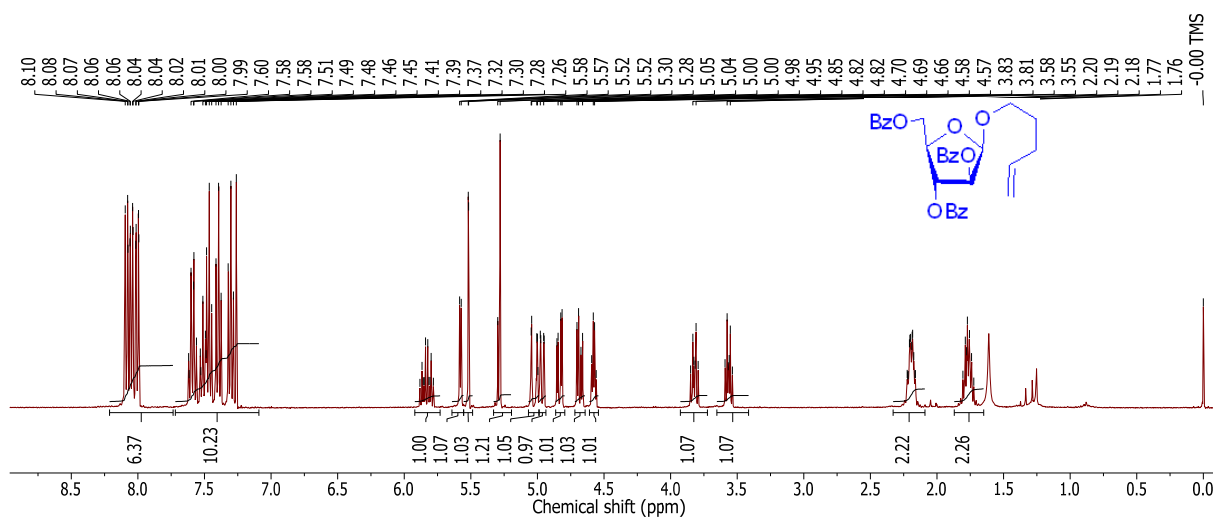

### $^{13}\text{C}$ NMR Spectrum (100.53 MHz, $\text{CDCl}_3$ ) of Compound **1b**<sup>5</sup>

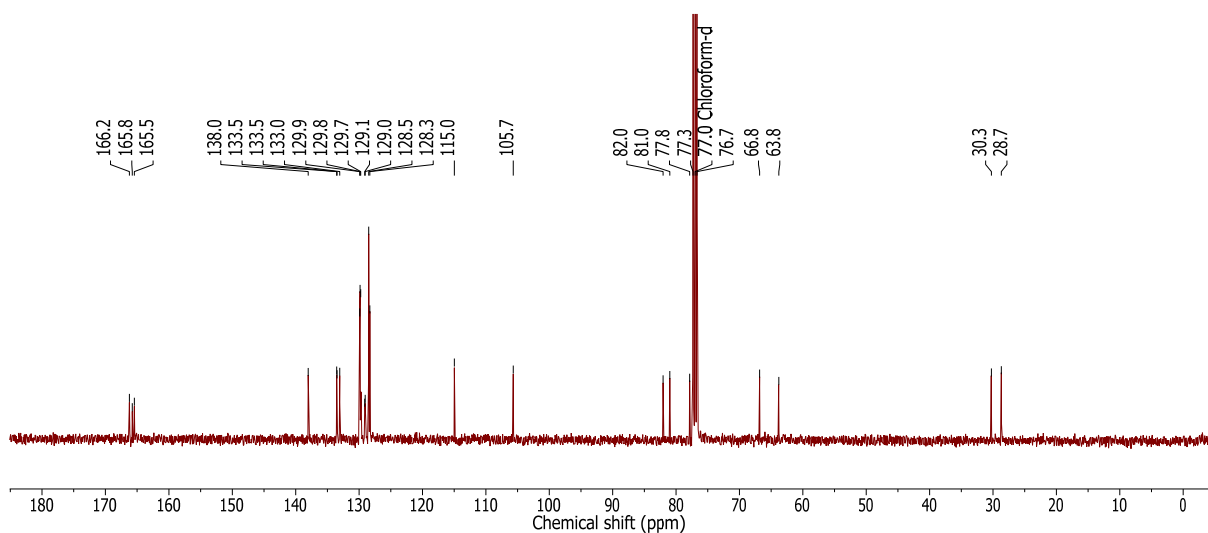

### DEPT NMR Spectrum (100.53 MHz, $\text{CDCl}_3$ ) of Compound **1b**<sup>5</sup>

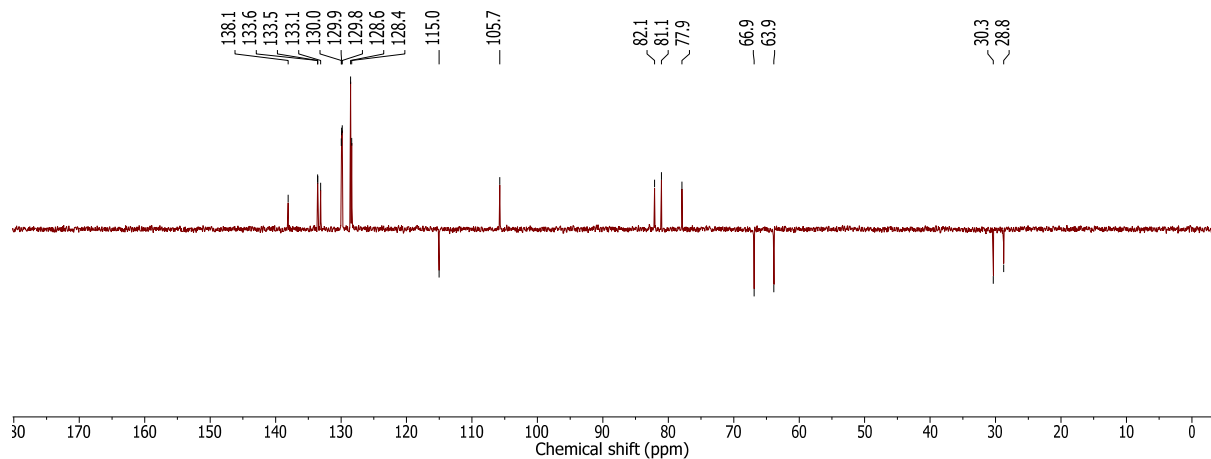

### $^1\text{H}$ NMR Spectrum (399.78 MHz, $\text{CDCl}_3$ ) of Compound **2b**<sup>5</sup>

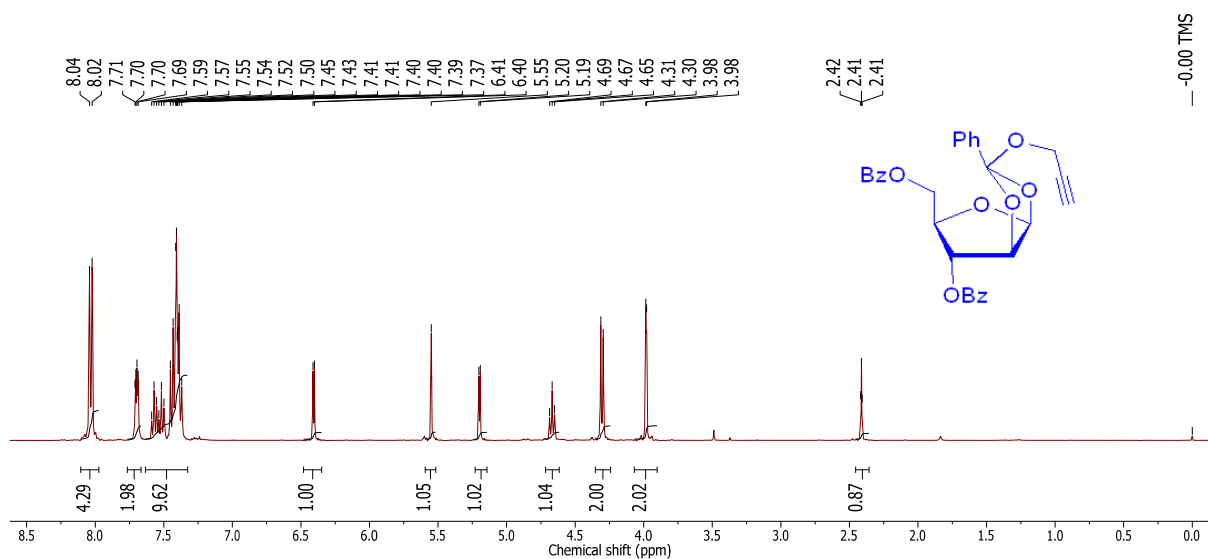

### $^{13}\text{C}$ NMR Spectrum (100.53 MHz, $\text{CDCl}_3$ ) of Compound **2b**<sup>5</sup>

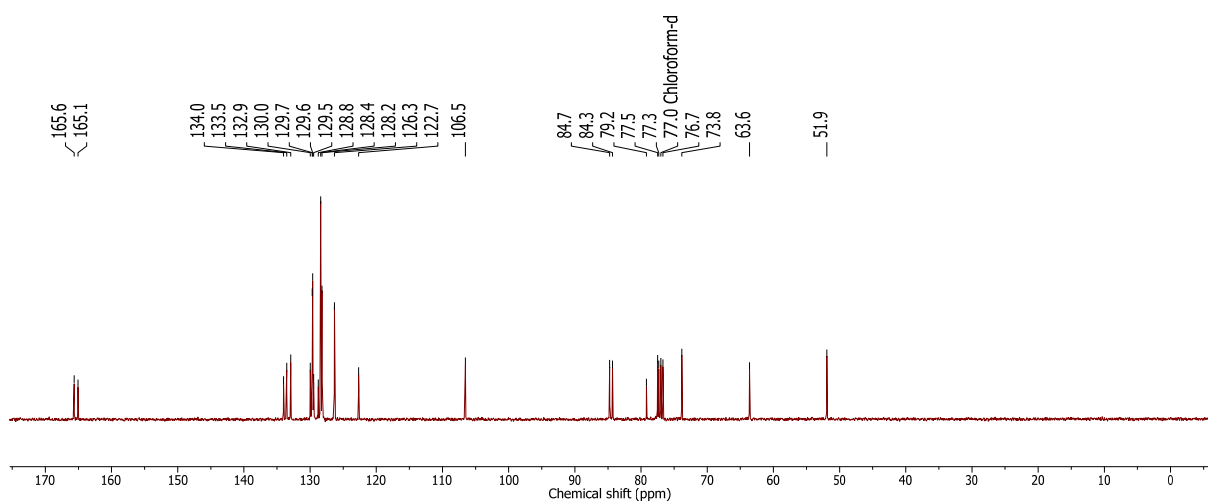

### DEPT NMR Spectrum (100.53 MHz, $\text{CDCl}_3$ ) of Compound **2b**<sup>5</sup>

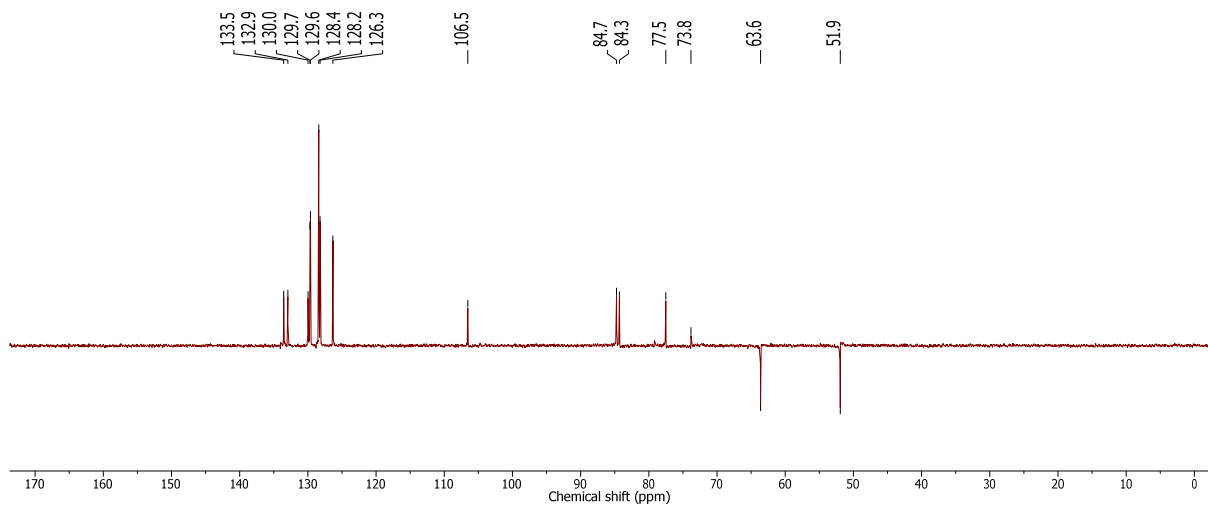



### $^1\text{H}$ NMR Spectrum (399.78 MHz, $\text{CDCl}_3$ ) of Compound $1\text{c}^2$

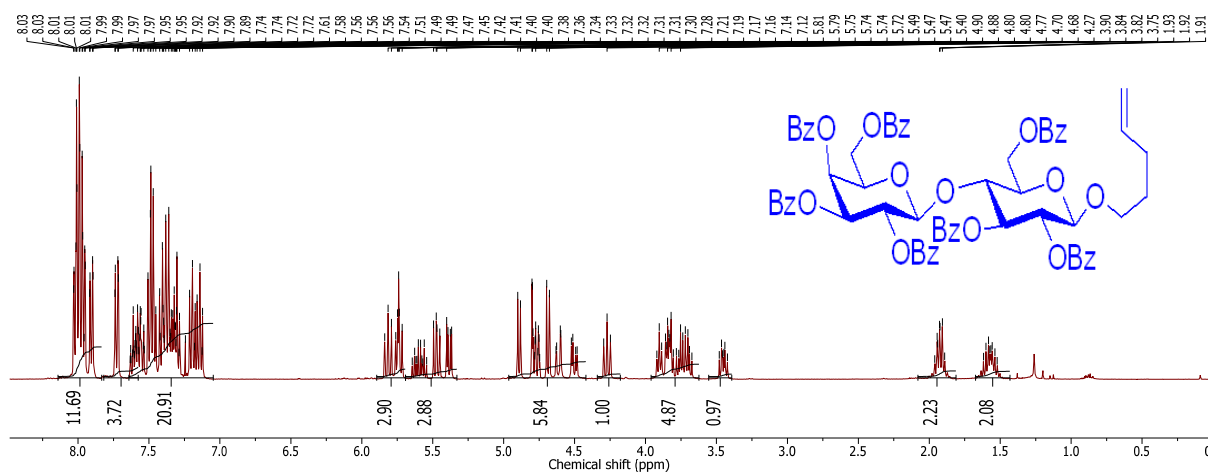

### $^{13}\text{C}$ NMR Spectrum (100.53 MHz, $\text{CDCl}_3$ ) of Compound $1\text{c}^2$

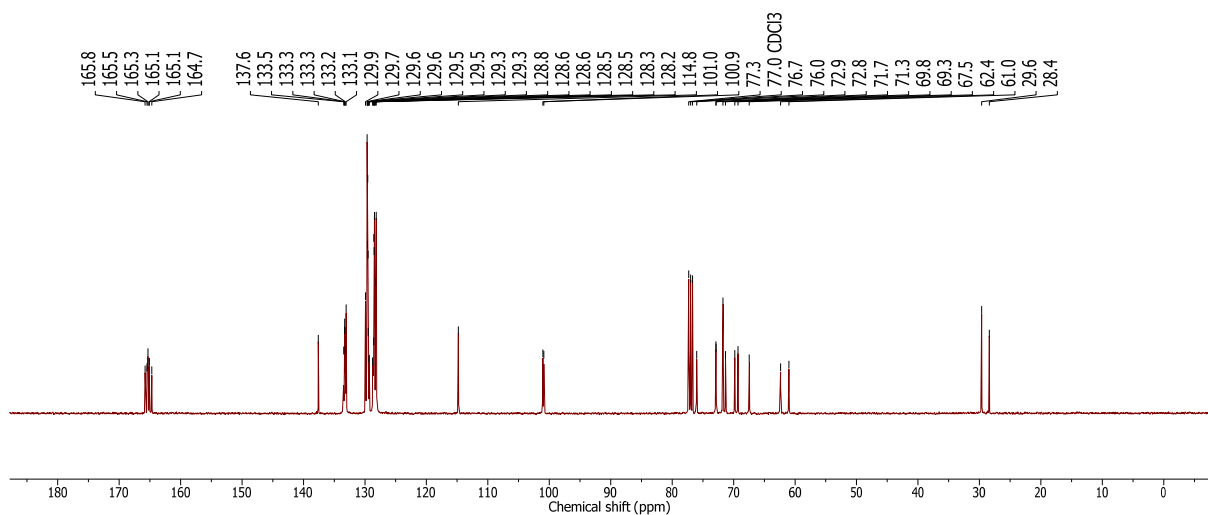

### DEPT NMR Spectrum (100.53 MHz, $\text{CDCl}_3$ ) of Compound $1\text{c}^2$

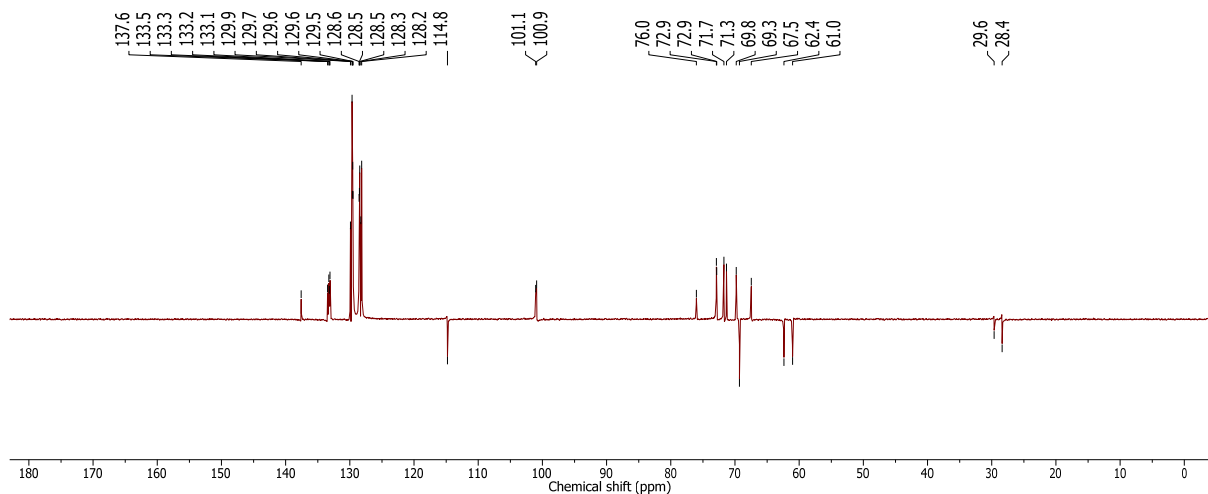

### $^1\text{H}$ NMR Spectrum (399.78 MHz, $\text{CDCl}_3$ ) of Compound $2\mathbf{c}^2$

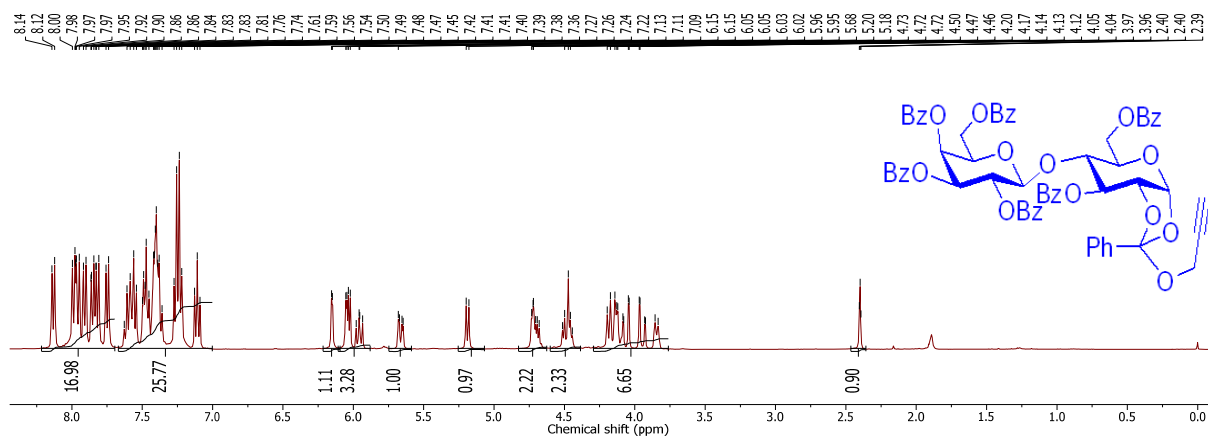

### $^{13}\text{C}$ NMR Spectrum (100.53 MHz, $\text{CDCl}_3$ ) of Compound $2\mathbf{c}^2$

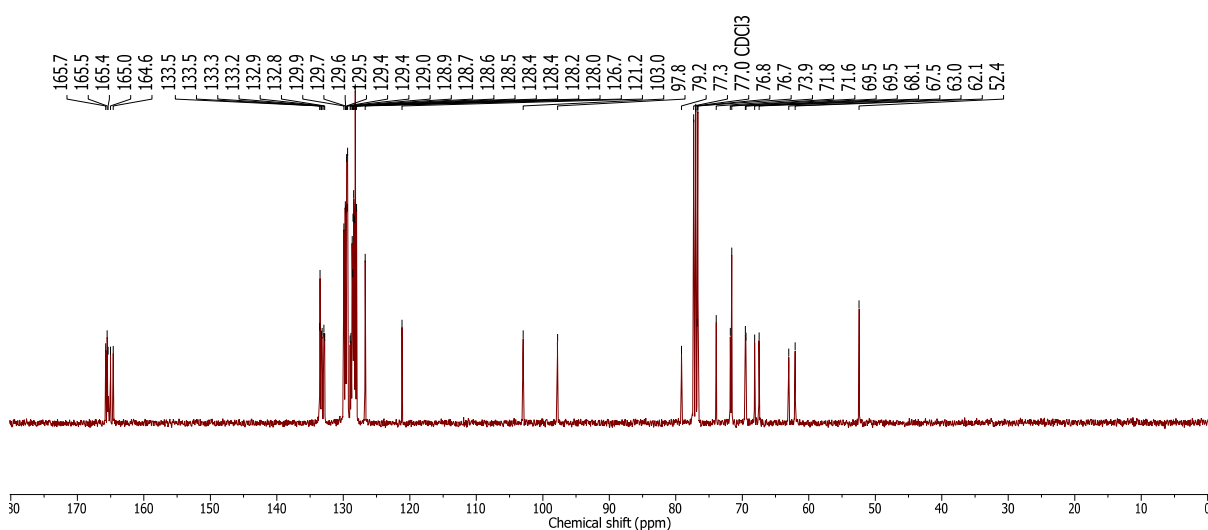

### DEPT NMR Spectrum (100.53 MHz, $\text{CDCl}_3$ ) of Compound $2\mathbf{c}^2$

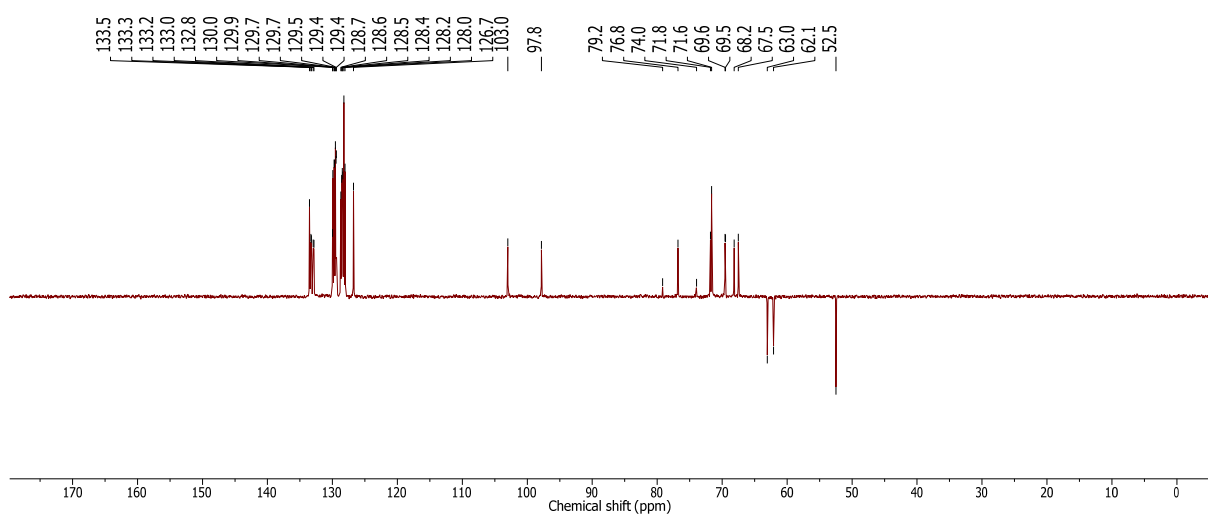

### <sup>1</sup>H NMR Spectrum (399.78 MHz, CDCl<sub>3</sub>) of Compound **1d**

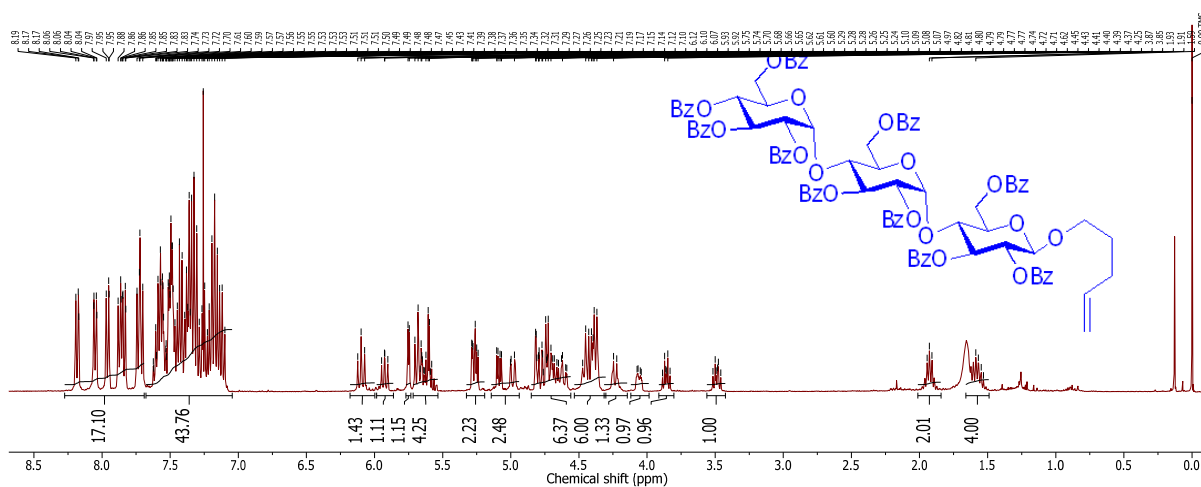

### <sup>13</sup>C NMR Spectrum (100.53 MHz, CDCl<sub>3</sub>) of Compound **1d**

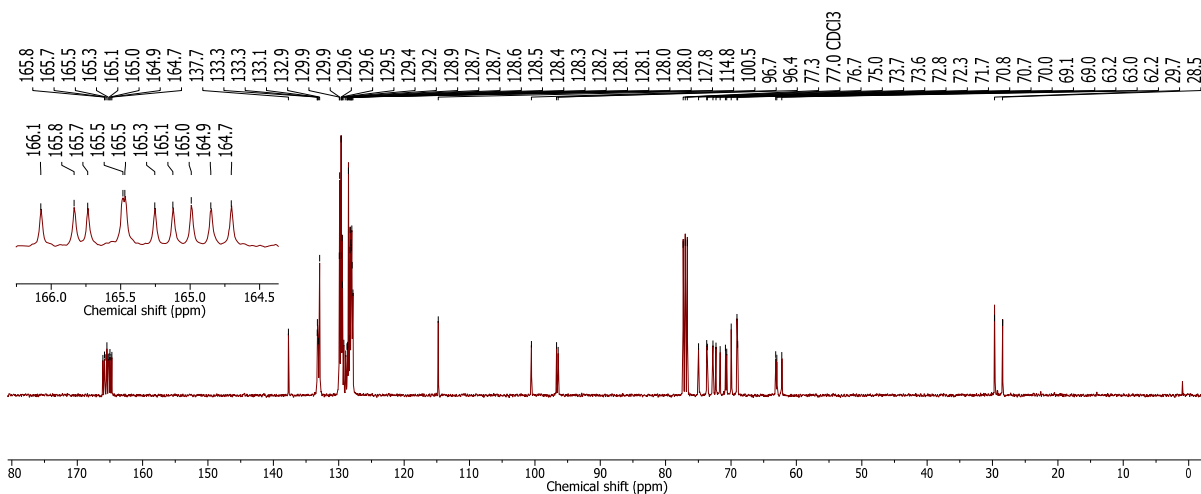

### DEPT NMR Spectrum (100.53 MHz, CDCl<sub>3</sub>) of Compound **1d**

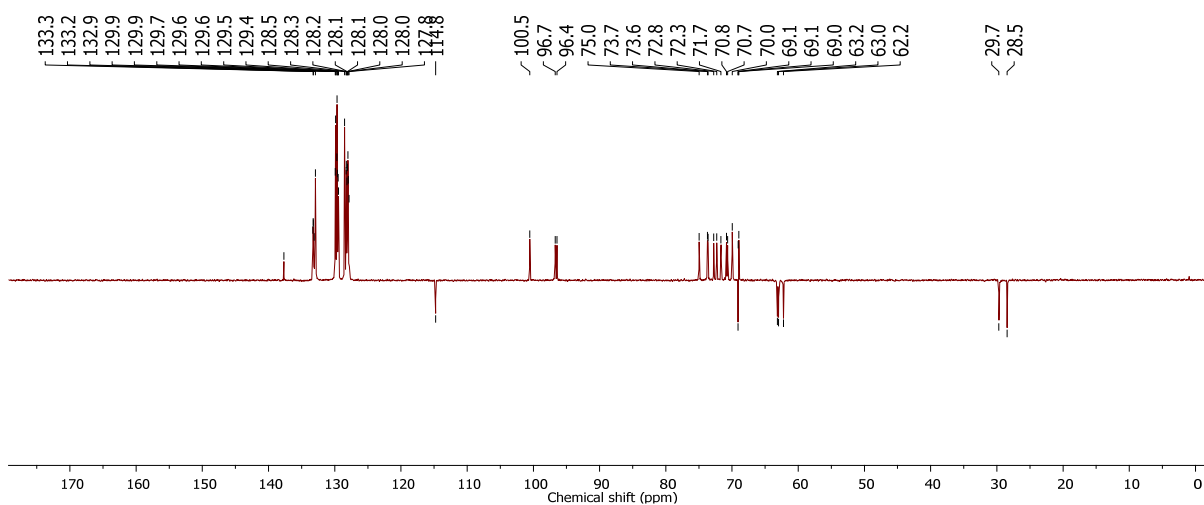



### <sup>1</sup>H NMR Spectrum (399.78 MHz, CDCl<sub>3</sub>) of Compound 4

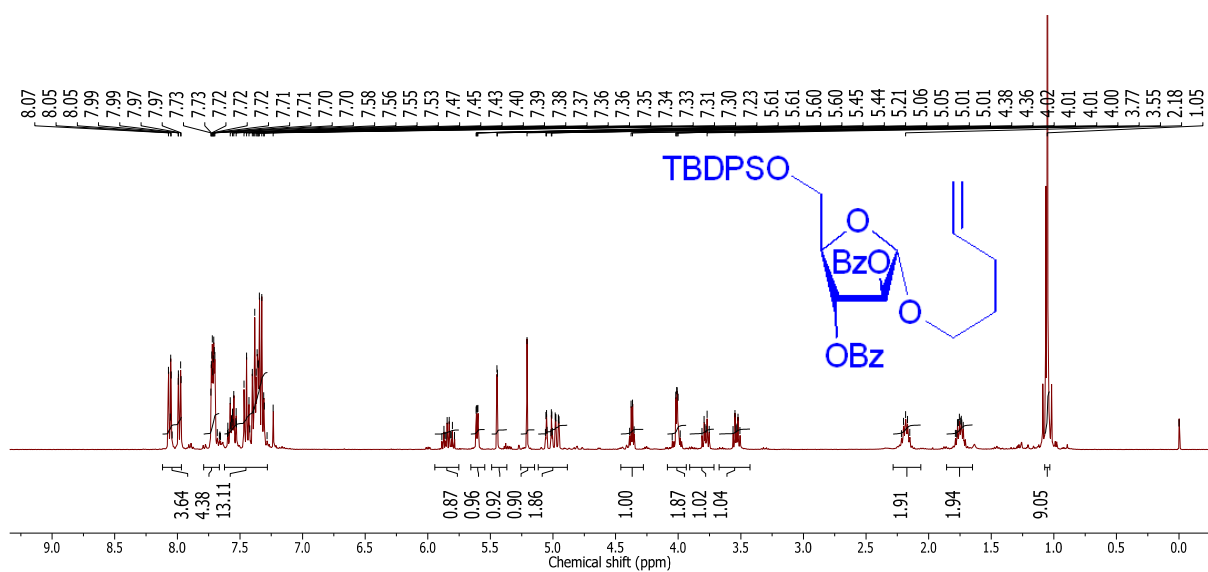

### <sup>13</sup>C NMR Spectrum (100.53 MHz, CDCl<sub>3</sub>) of Compound 4

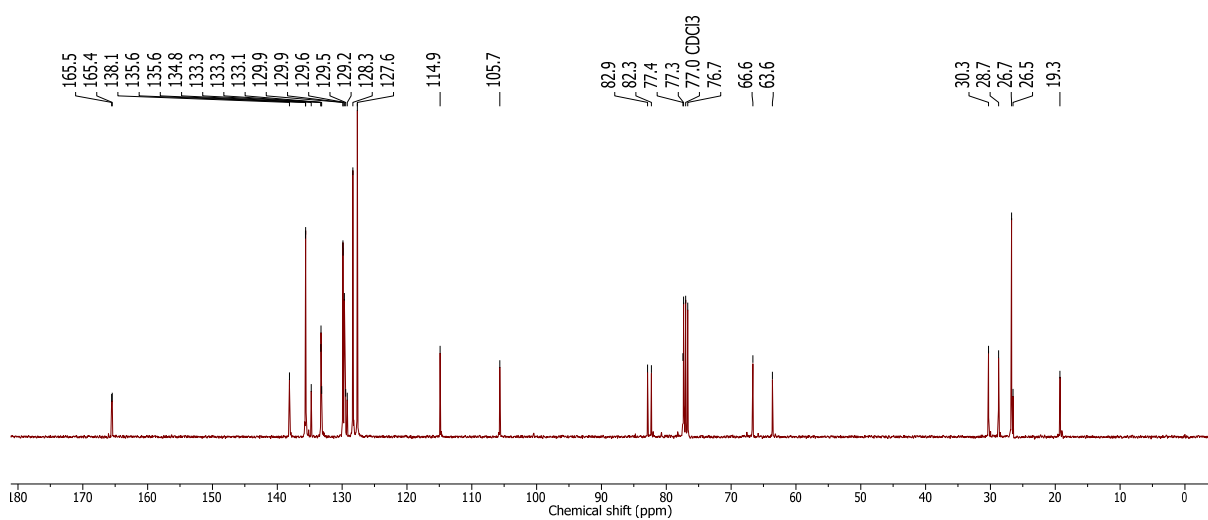

### DEPT NMR Spectrum (100.53 MHz, CDCl<sub>3</sub>) of Compound 4

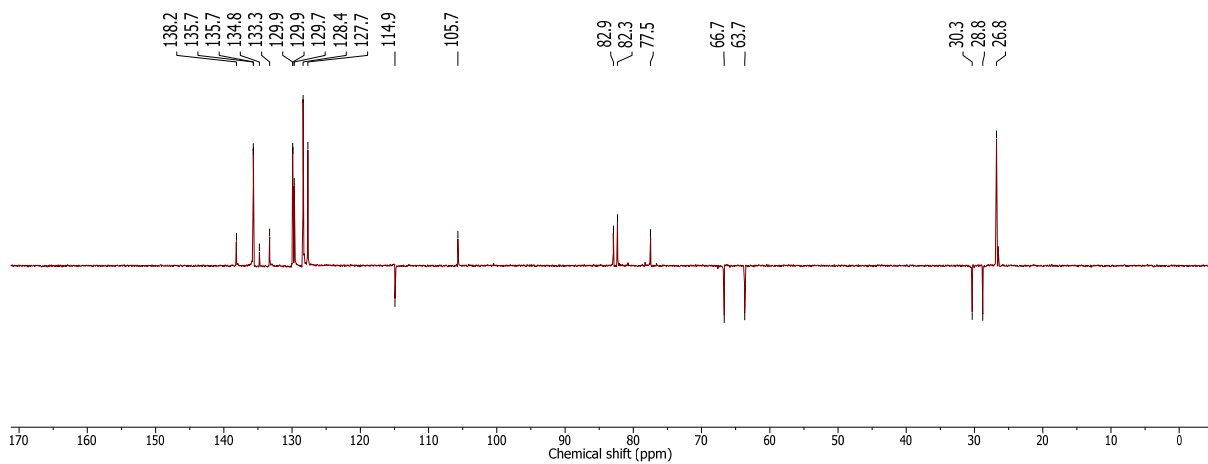

### $^1\text{H}$ NMR Spectrum (399.78 MHz, $\text{CDCl}_3$ ) of Compound **5**

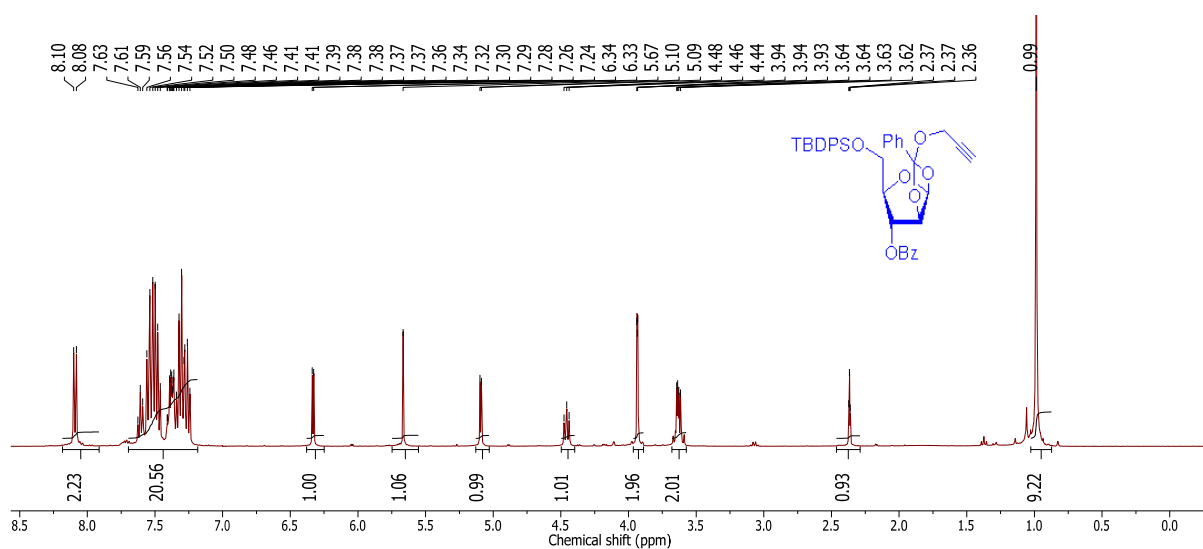

### $^{13}\text{C}$ NMR Spectrum (100.53 MHz, $\text{CDCl}_3$ ) of Compound **5**

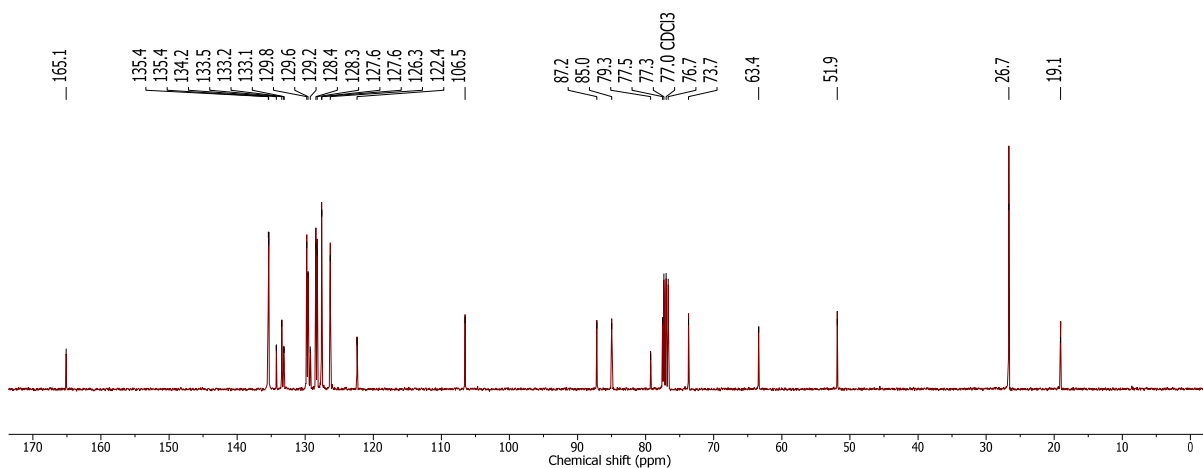

### DEPT NMR Spectrum (100.53 MHz, $\text{CDCl}_3$ ) of Compound **5**

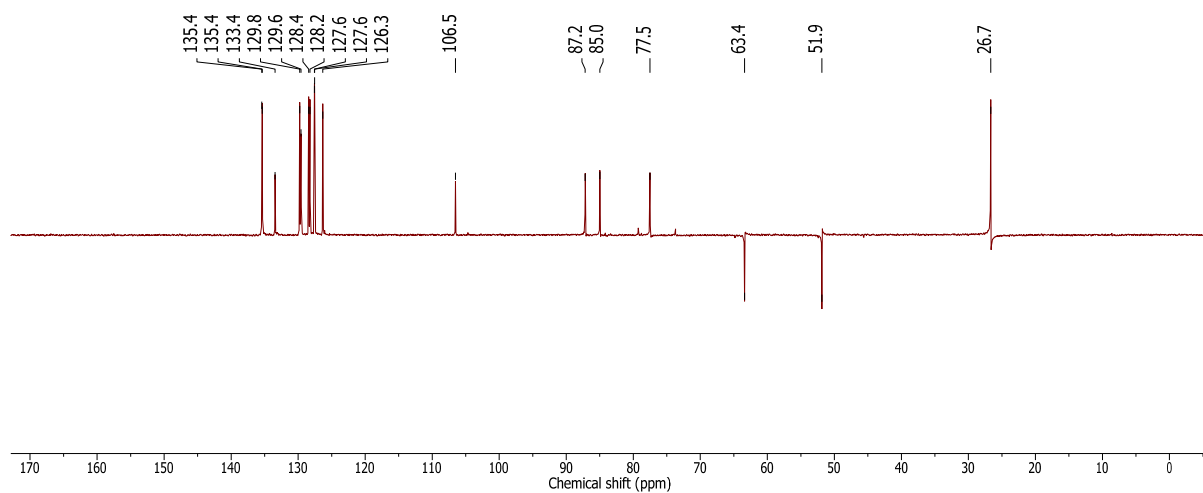

### $^1\text{H}$ NMR Spectrum (399.78 MHz, $\text{CDCl}_3$ ) of Compound 6

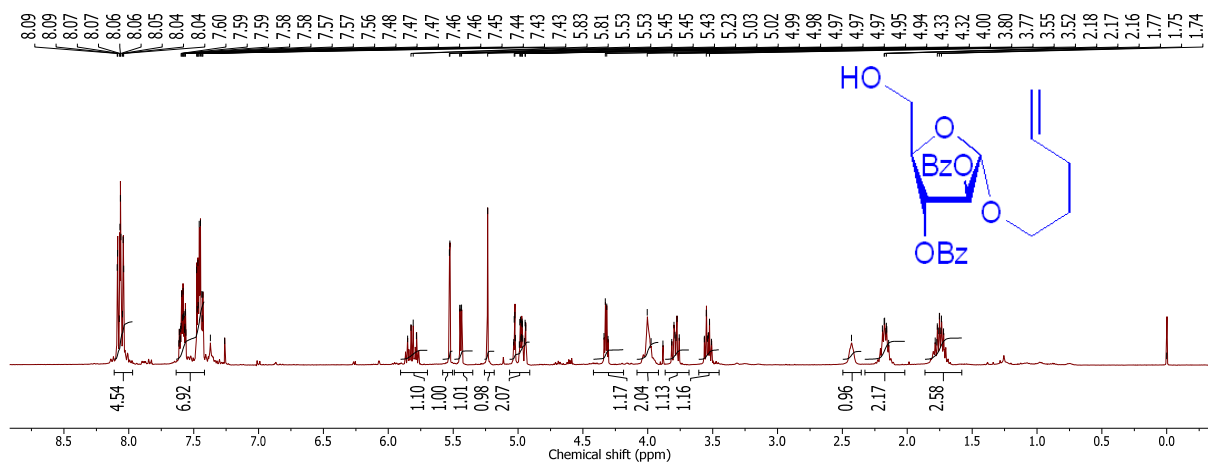

### $^{13}\text{C}$ NMR Spectrum (100.53 MHz, $\text{CDCl}_3$ ) of Compound 6

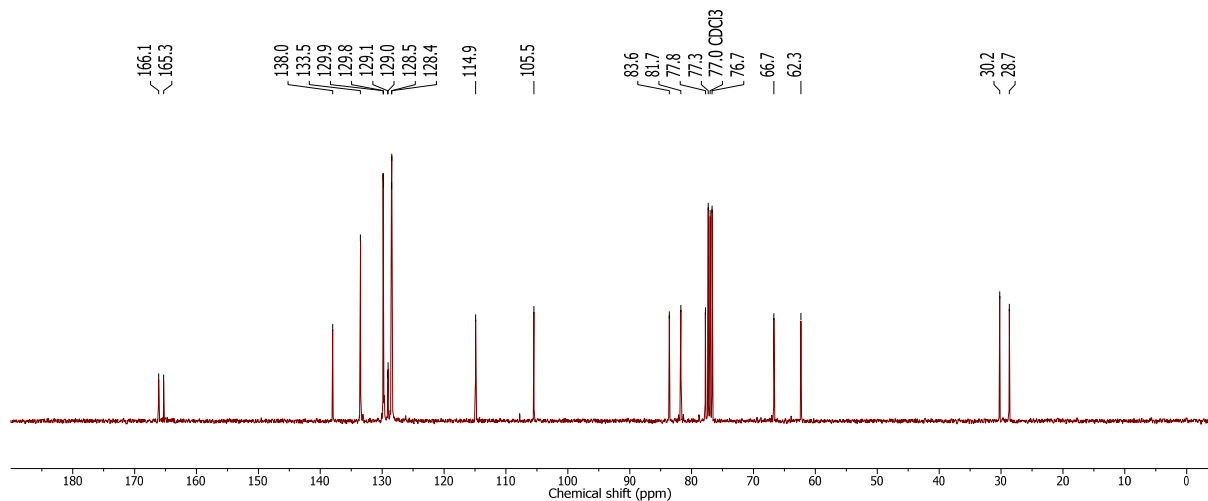

### DEPT NMR Spectrum (100.53 MHz, $\text{CDCl}_3$ ) of Compound 6

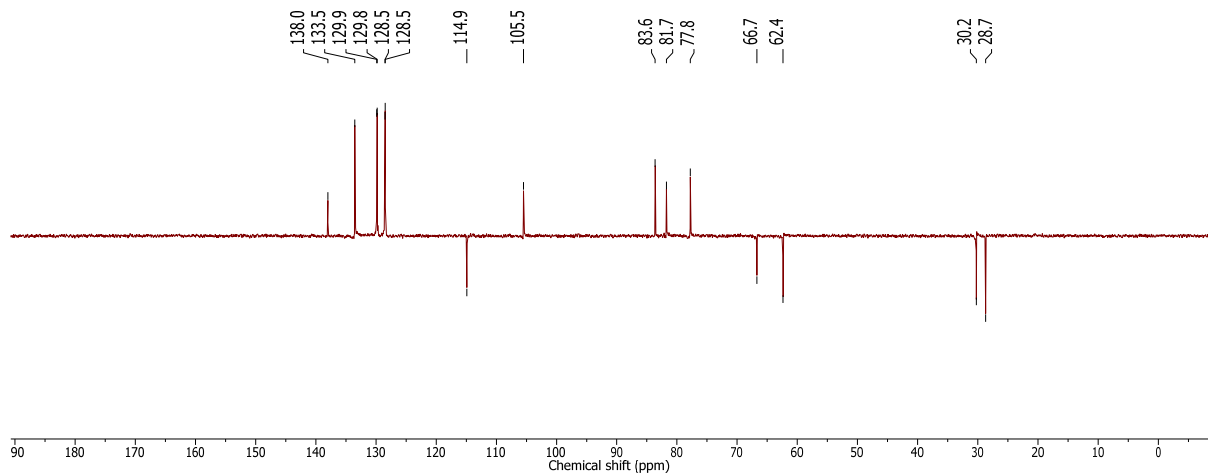

### $^1\text{H}$ NMR Spectrum (399.78 MHz, $\text{CDCl}_3$ ) of Compound 7

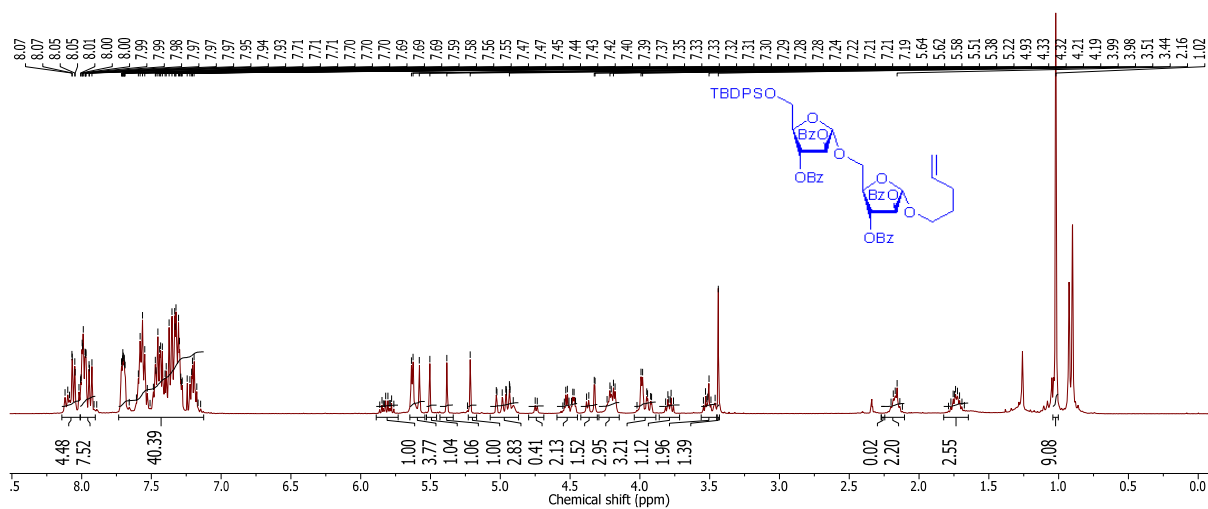

### $^{13}\text{C}$ NMR Spectrum (100.53 MHz, $\text{CDCl}_3$ ) of Compound 7

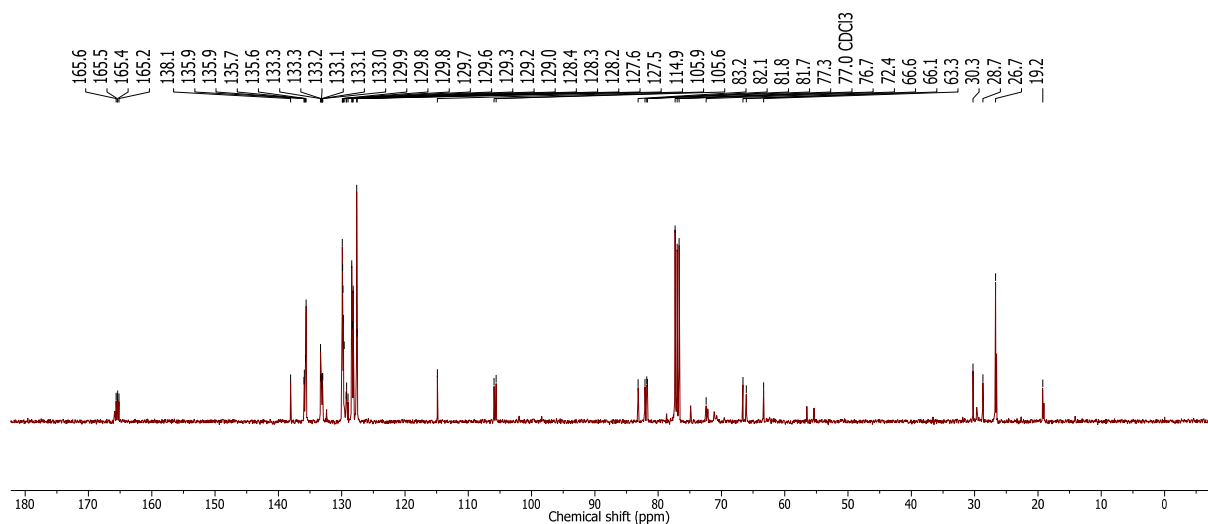

### DEPT NMR Spectrum (100.53 MHz, $\text{CDCl}_3$ ) of Compound 7

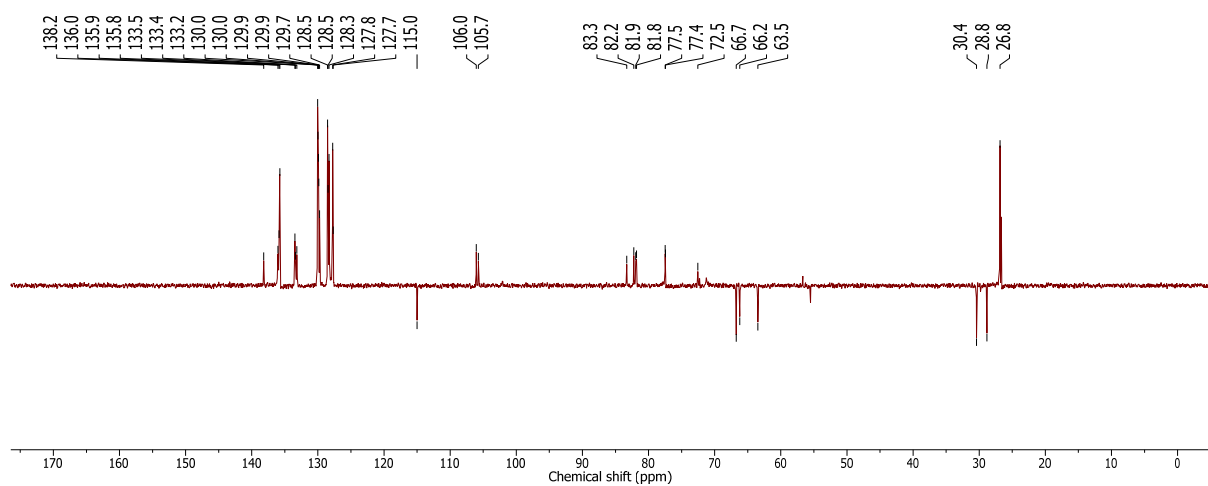





### <sup>1</sup>H NMR Spectrum (399.78 MHz, CDCl<sub>3</sub>) of Compound **9**

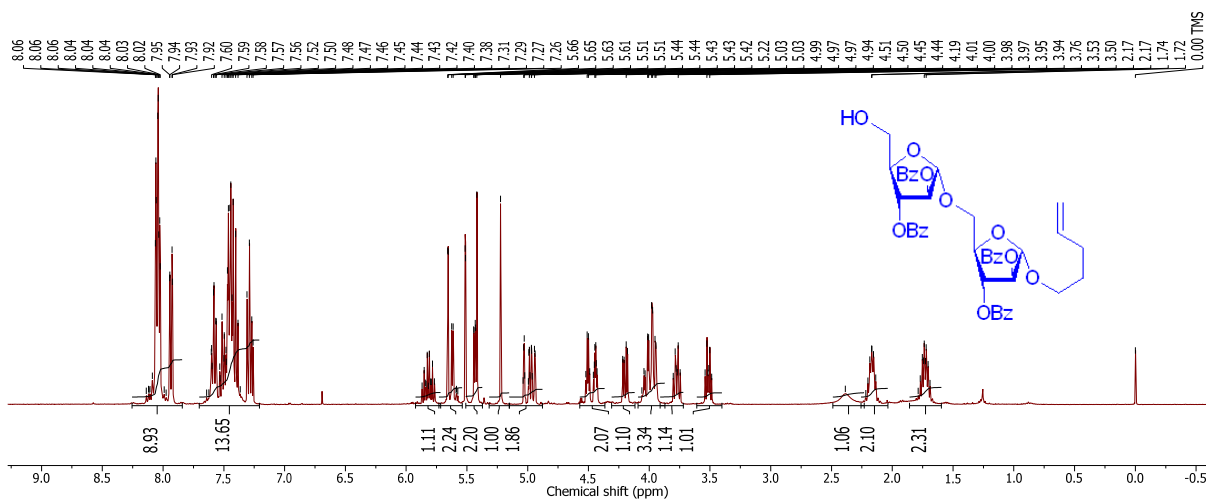

### <sup>13</sup>C NMR Spectrum (100.53 MHz, CDCl<sub>3</sub>) of Compound **9**

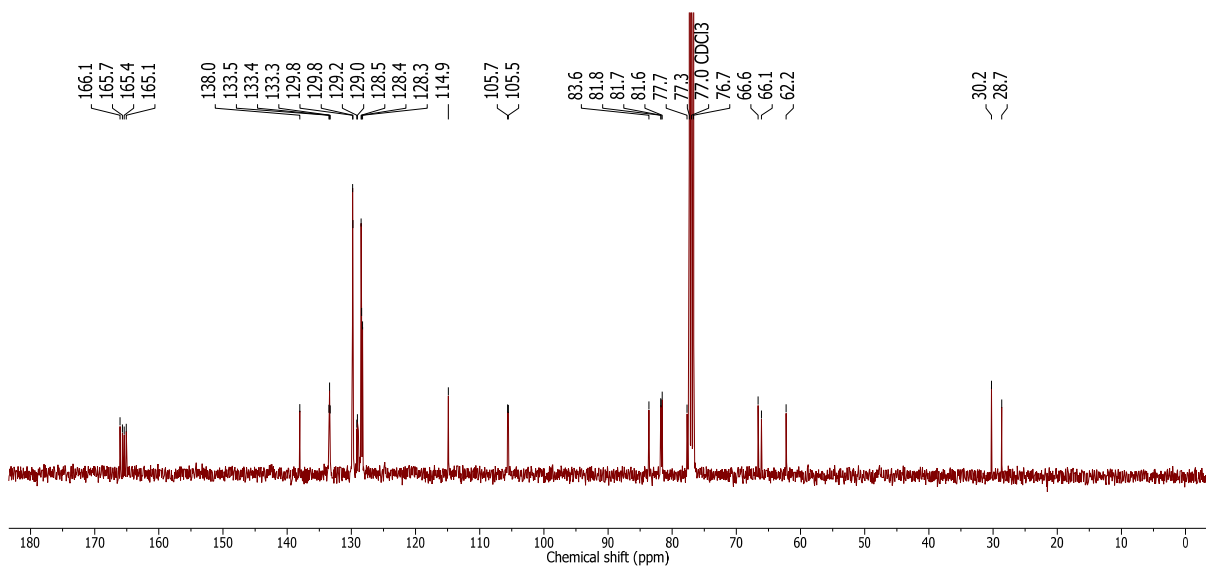

### DEPT NMR Spectrum (100.53 MHz, CDCl<sub>3</sub>) of Compound **9**

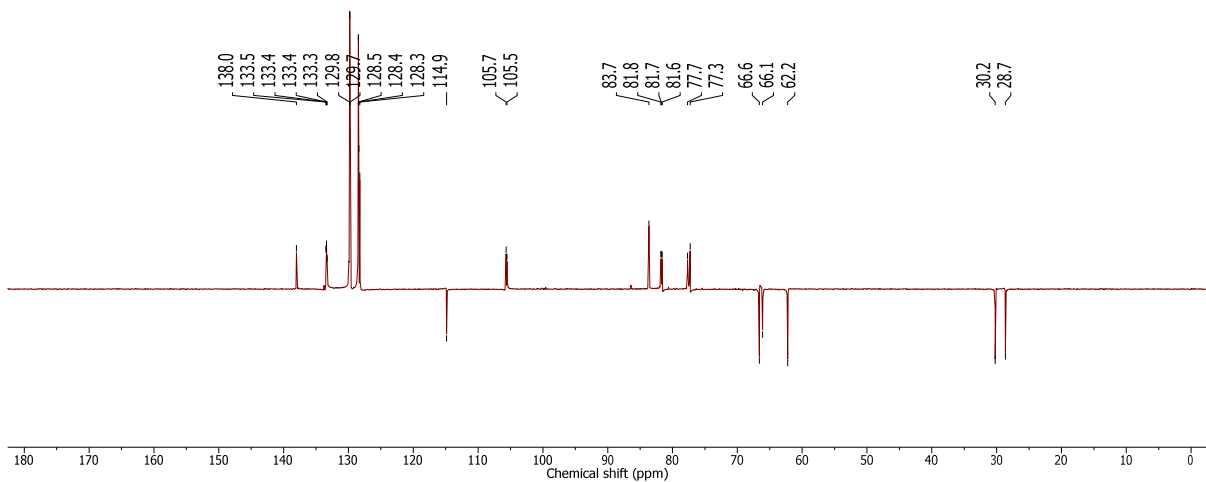

# <sup>1</sup>H NMR Spectrum (399.78 MHz, CDCl<sub>3</sub>) of Compound 10

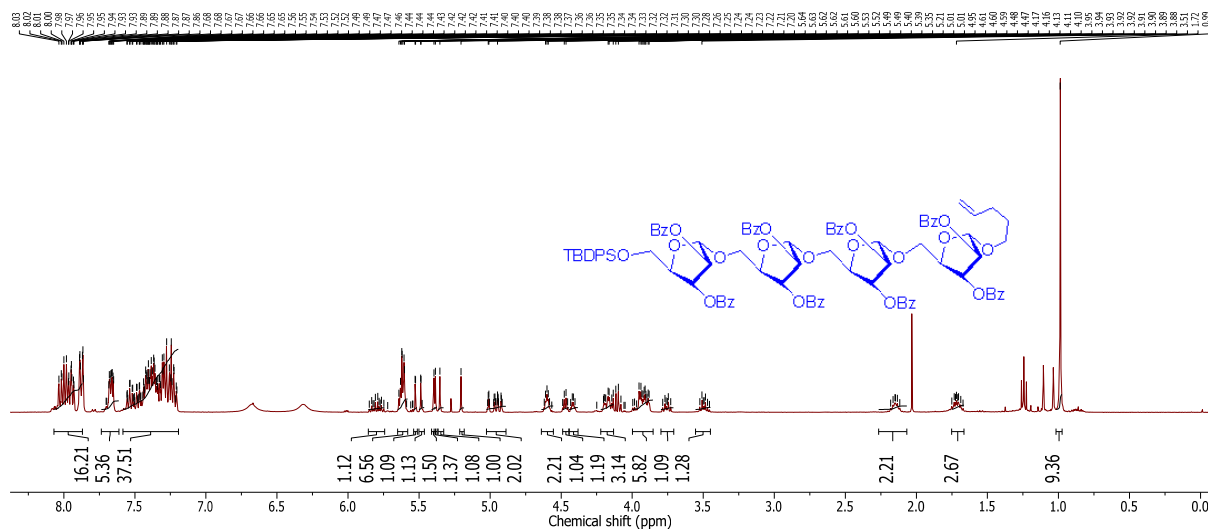

# <sup>13</sup>C NMR Spectrum (100.53 MHz, CDCl<sub>3</sub>) of Compound 10

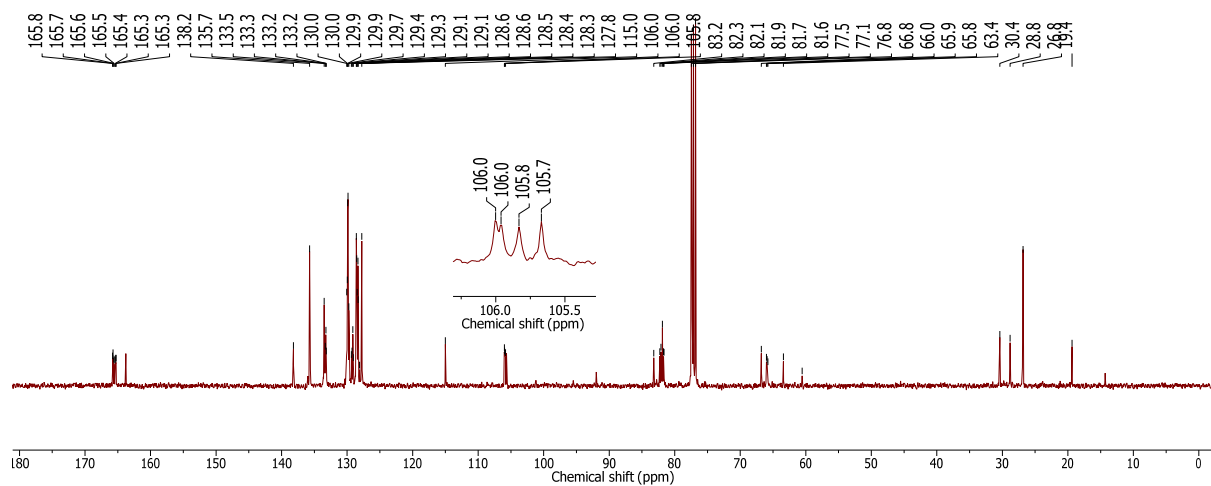

# DEPT NMR Spectrum (100.53 MHz, CDCl<sub>3</sub>) of Compound 10

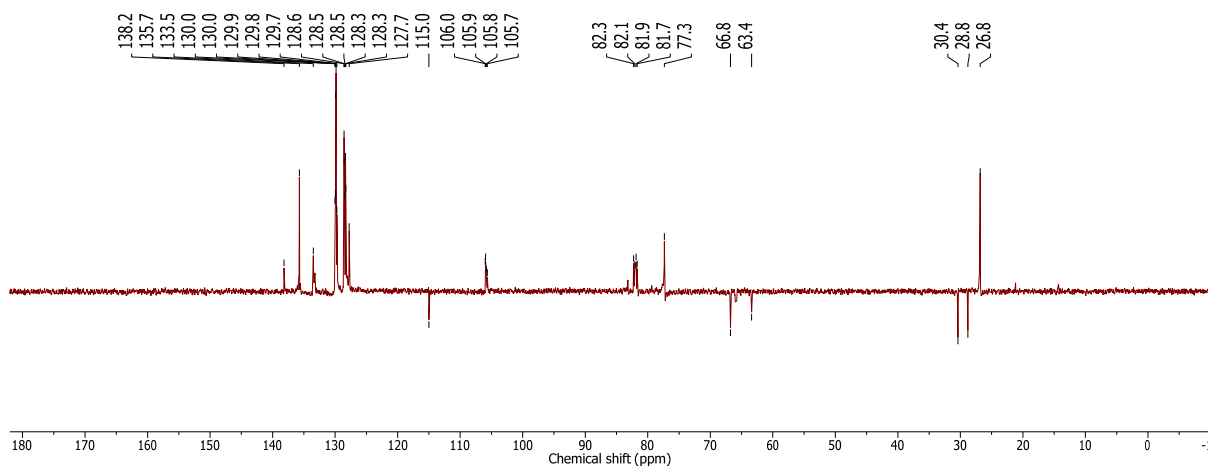

# <sup>1</sup>H NMR Spectrum (399.78 MHz, CDCl<sub>3</sub>) of Compound 11

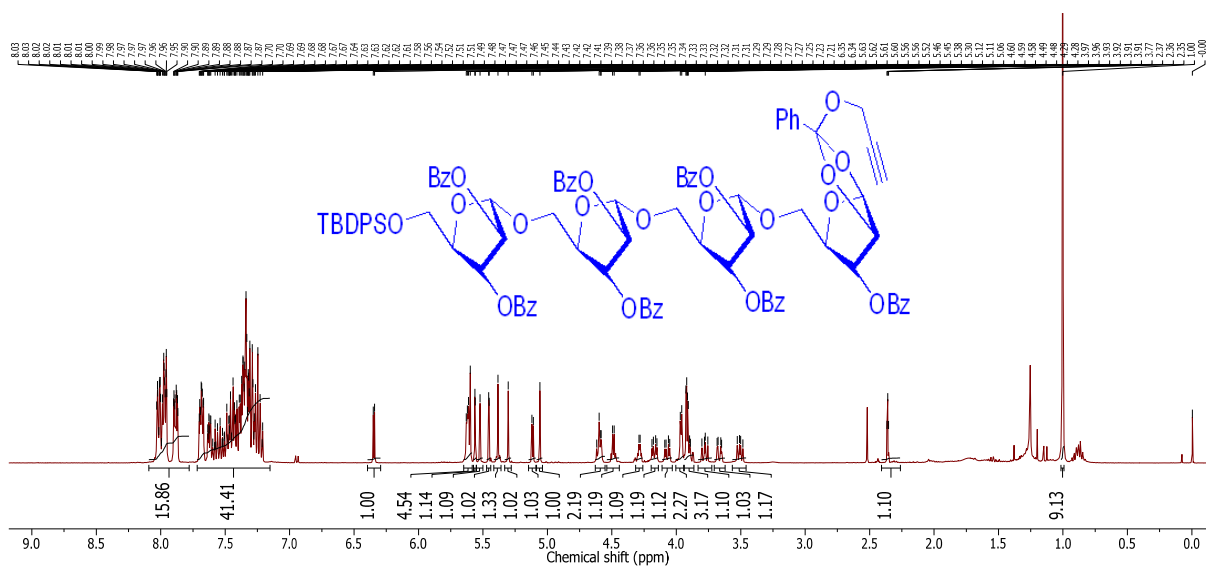

# <sup>13</sup>C NMR Spectrum (100.53 MHz, CDCl<sub>3</sub>) of Compound 11

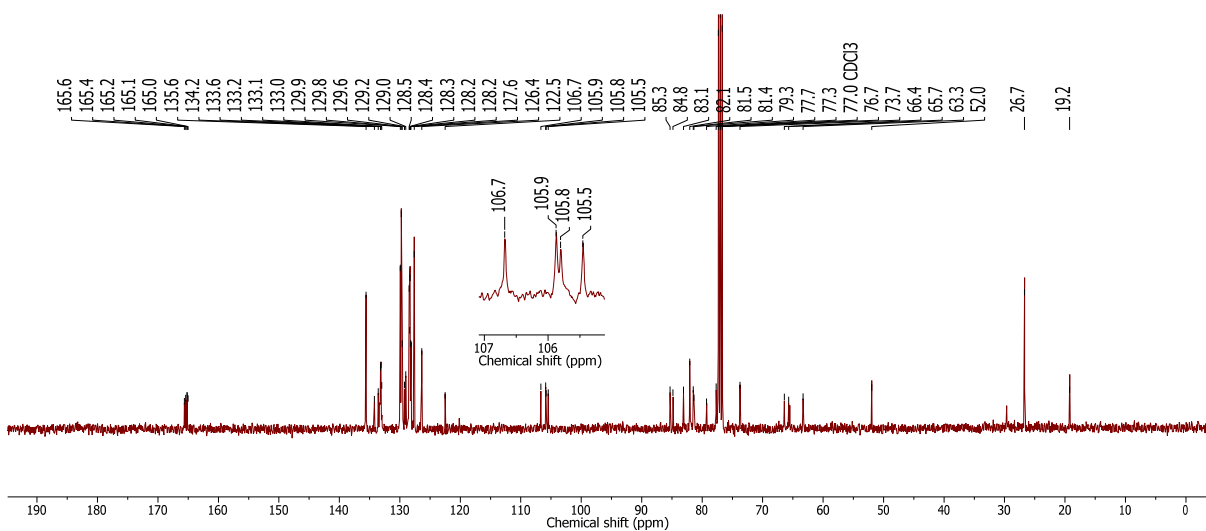

# DEPT NMR Spectrum (100.53 MHz, CDCl<sub>3</sub>) of Compound 11

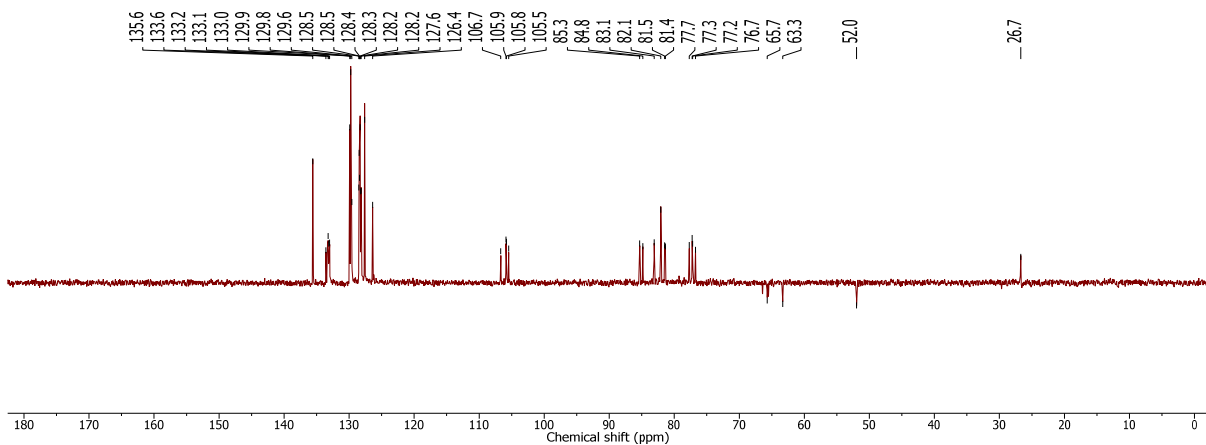

# <sup>1</sup>H NMR Spectrum (399.78 MHz, CDCl<sub>3</sub>) of Compound 12

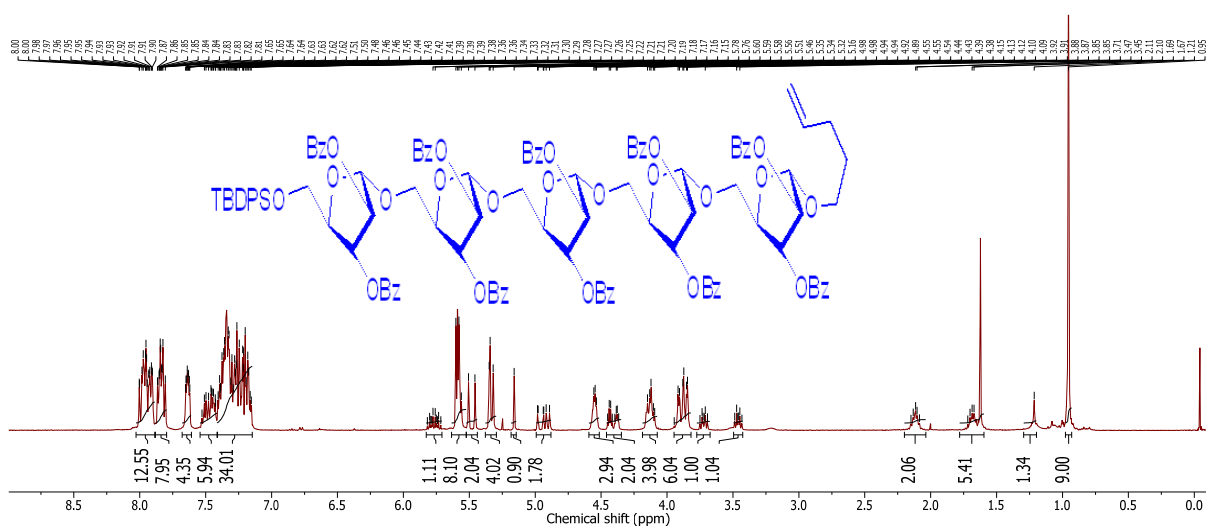

# <sup>13</sup>C NMR Spectrum (100.53 MHz, CDCl<sub>3</sub>) of Compound 12

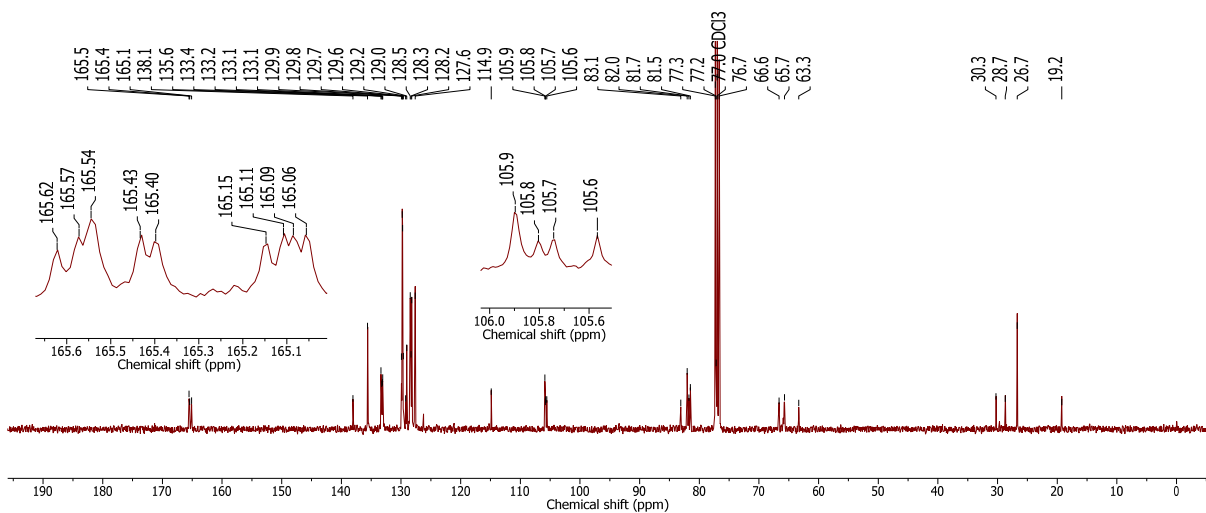

# DEPT NMR Spectrum (100.53 MHz, CDCl<sub>3</sub>) of Compound 12

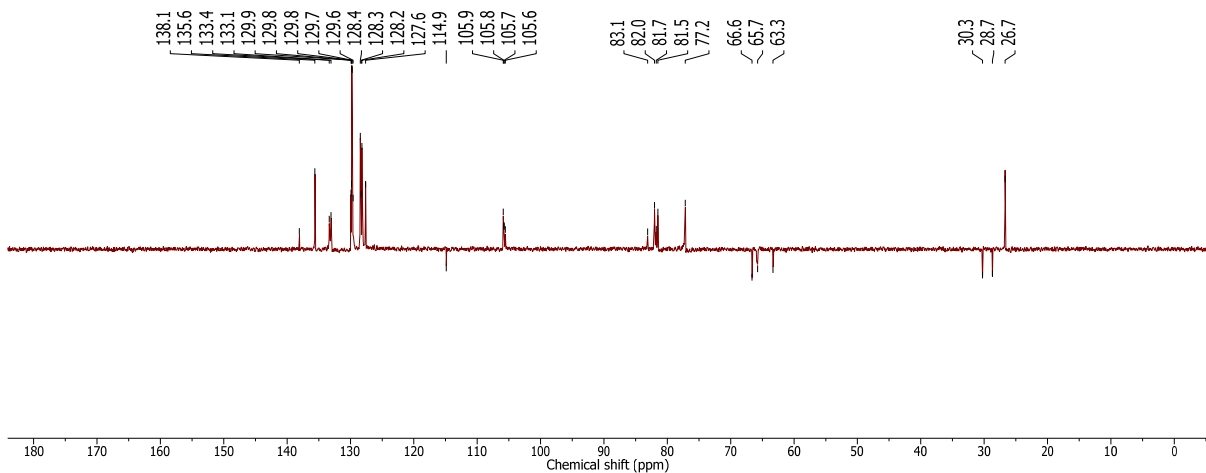

### $^1\text{H}$ NMR Spectrum (399.78 MHz, $\text{D}_2\text{O}$ ) of Compound **13**

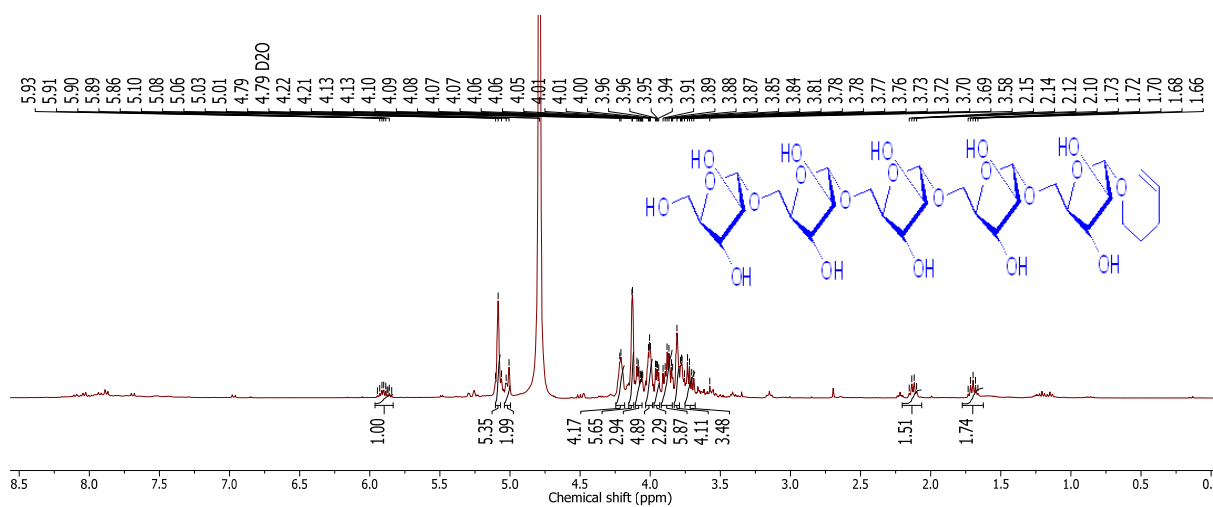

### $^{13}\text{C}$ NMR Spectrum (100.53 MHz, $\text{D}_2\text{O}$ ) of Compound **13**

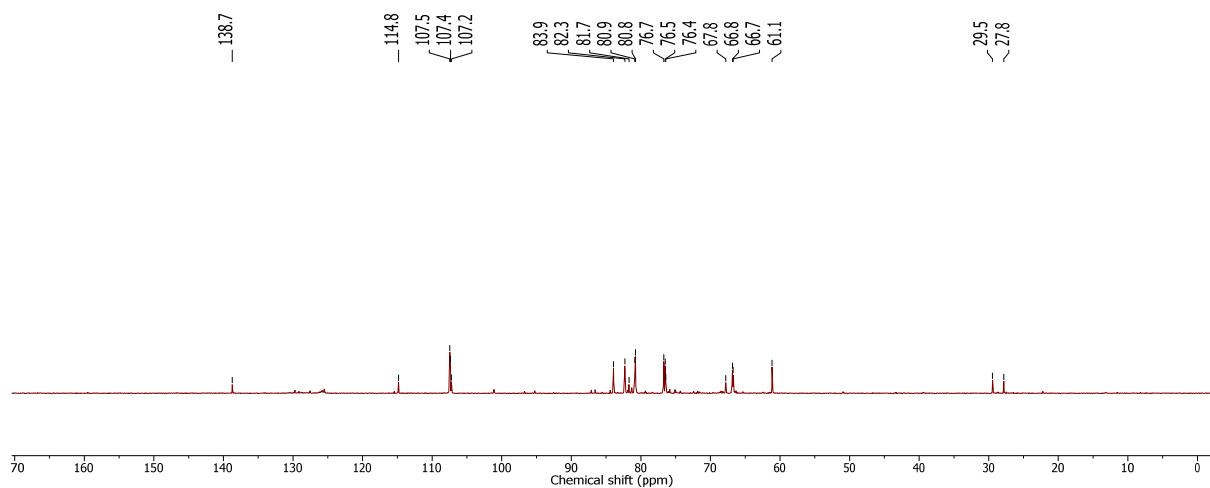

### DEPT NMR Spectrum (100.53 MHz, $\text{D}_2\text{O}$ ) of Compound **13**

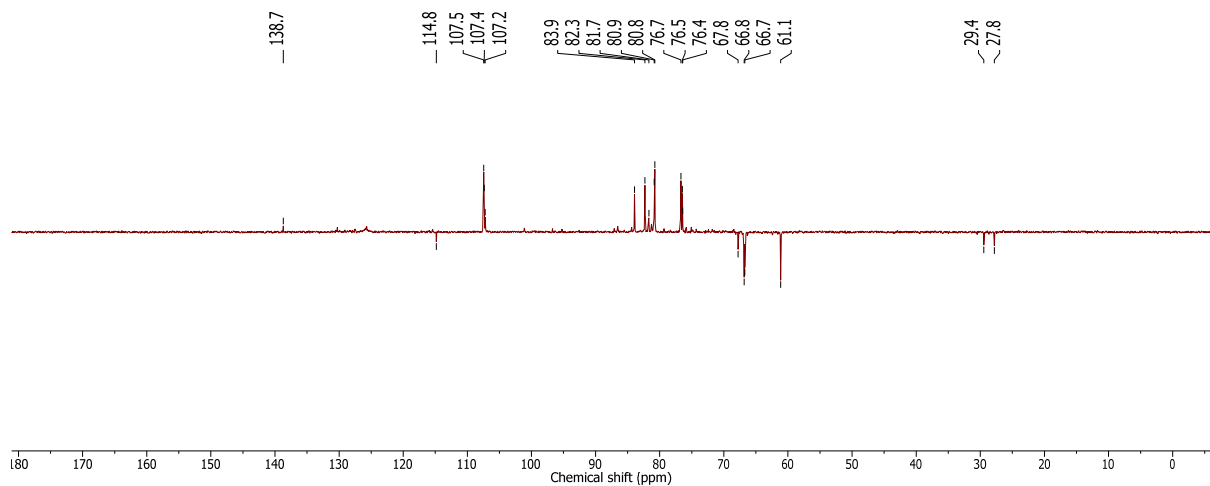

## References

1. B. Fraser-Reid, U. E. Udodong, Z. Wu, H. Ottoson, J. R. Merrit, C. S. Rao, C. Roberts, and R. Madsen, *Synlett*, 1992, 927.
2. (a) S. R. Vidadala, S. A. Thadke, and S. Hotha, *J. Org. Chem.*, 2009, **74**, 9233; (b) G. Sureshkumar and S. Hotha, *Chem Commun.*, 2008, **36**, 4282; (c) G. Sureshkumar and S. Hotha, *Tetrahedron Lett.*, 2007, **48**, 6564.
3. (a) C. Uriel, J. Ventura, A. M. Gómez, J. C. López, and B. Fraser-Reid; *Eur. J. Org. Chem.* 2012, 3122; (b) A. Ravidá, X. Liu, L. Kovacs, and P. H. Seeberger, *Org. Lett.*, 2006, **8**, 1815.
4. N. I. Uvarova, G. I. Oshitok, N. F. Samoshina, G. B. Elyakov, *Chemistry of Natural Compounds* 1973, **10**, 466.
5. (a) S. A. Thadke, B. Mishra, and S. Hotha, *Org. Lett.*, 2013, **15**, 2466; (b) S. A. Thadke, B. Mishra, and S. Hotha, *J. Org. Chem.*, 2014, **79**, 7358.
